# Supplementary material for: Expansion of the (BB)Ru metallacycle with coinage metal cations: formation of B–M–Ru–B (M = Cu, Ag, Au) dimetalacyclodiboryls
Source: Royal Society of Chemistry journal article supplement (doi:10.1039/c8sc00190a), 2018-01-01
Supplement: c8sc00190a2.pdf [file c8sc00190a2.pdf]

## Electronic Supplementary Material (ESI)

### Expansion of the (BB)>Ru Metallacycle with Coinage Metal Cations: Formation of B-M-Ru-B (M = Cu, Ag, Au) Dimetalacyclodiboryls

Bennett J. Eleazer<sup>a</sup>, Mark D. Smith<sup>a</sup>, Alexey A. Popov<sup>b\*</sup>, and Dmitry V. Peryshkov<sup>a\*</sup>.

a). Department of Chemistry and Biochemistry, University of South Carolina, 631 Sumter St., Columbia, South Carolina 29208, United States.

b). Leibniz Institute for Solid State and Materials Research, Helmholtzstrasse 20, 01069 Dresden, Germany.

## Experimental

All synthetic manipulations were carried out either in a nitrogen-filled drybox or on an air-free dual-manifold Schlenk line, unless stated otherwise. Compounds **2-Cu**, **2-Au**, and **2-Ag** were found to be moderately stable on air in solid state. Solvents were sparged with nitrogen, passed through activated alumina, and stored over activated 4 Å Linde-type molecular sieves. Benzene-*d*<sub>6</sub> and dichloromethane-*d*<sub>2</sub> were degassed and stored over activated 4 Å Linde-type molecular sieves. NMR spectra were recorded using Varian spectrometers at 400 (<sup>1</sup>H), 100 (<sup>13</sup>C), 162 (<sup>31</sup>P), 128 (<sup>11</sup>B) MHz, reported in δ (parts per million) and referenced to the residual <sup>1</sup>H/<sup>13</sup>C signals of the deuterated solvent or an external 85% H<sub>3</sub>PO<sub>4</sub> (<sup>31</sup>P (δ): 0.0 ppm) and BF<sub>3</sub>(Et<sub>2</sub>O) (<sup>11</sup>B(δ): 0.0 ppm) standards. J values are given in Hz. Midwest Microlab, Indianapolis, Indiana provided the elemental analysis results.

(POBBOP)Ru(CO)<sub>2</sub> carboryne (POBBOP = 1,7-OP(*i*-Pr)<sub>2</sub>-*m*-2,6-dehydrocarborane) was prepared using the previously reported procedure.<sup>1</sup> *m*-carborane C<sub>2</sub>B<sub>10</sub>H<sub>12</sub> (Katchem) was used as received.

### Synthesis of [(POBBOP)(Ru)(CO)<sub>2</sub>(Cu)(Cl)]<sub>2</sub> complex (**2-Cu**)

A portion of CuCl (0.009 g; 0.091 mmol) was added to a solution of (POBBOP)Ru(CO)<sub>2</sub> (0.050g; 0.089 mmol) in C<sub>6</sub>D<sub>6</sub> (0.5 mL) and tetrahydrofuran (1 mL). The reaction mixture was then transferred to a J Young valve NMR tube and heated for 12 hours at 90 °C. The resulting solution was dried under vacuum, triturated with hexanes (3 × 1 mL) and acetonitrile (1 mL), and filtered. The tetrahydrofuran extract was evaporated producing a white solid. Yield: 0.041 g, 0.031 mmol, 70%.

<sup>1</sup>H NMR (C<sub>6</sub>D<sub>6</sub>): δ 2.26 (br, 2H, (PCH(CH<sub>3</sub>)<sub>2</sub>), 1.91 (br, 2H, (PCH(CH<sub>3</sub>)<sub>2</sub>), 1.29 (m, 6H, (PCH(CH<sub>3</sub>)<sub>2</sub>), 0.87 (m, 6H, (PCH(CH<sub>3</sub>)<sub>2</sub>), 0.76 (m, 6H, (PCH(CH<sub>3</sub>)<sub>2</sub>), 0.66 (m, 6H, (PCH(CH<sub>3</sub>)<sub>2</sub>). <sup>11</sup>B{<sup>1</sup>H} (C<sub>6</sub>D<sub>6</sub>): δ -1.5 (B-Ru), -10.3 (B-Cu), -11.0 (B-H), -12.2 (B-H), -12.9 (B-H), -15.5 (B-H). <sup>13</sup>C (CDCl<sub>3</sub>): δ 111.9 (C<sub>2</sub>B<sub>10</sub>H<sub>10</sub>), 33.7 (PCH(CH<sub>3</sub>)<sub>2</sub>), 18.1 (PCH(CH<sub>3</sub>)<sub>2</sub>), 16.8 (PCH(CH<sub>3</sub>)<sub>2</sub>). <sup>31</sup>P{<sup>1</sup>H} (C<sub>6</sub>D<sub>6</sub>): δ 204.2. Selected bands in the IR spectrum, cm<sup>-1</sup>: 2990–2880 (br, CH), 2600 (br, BH), 2020 (strong, Ru-CO), 1969 (strong, Ru-CO). Found: C, 29.29; H, 5.53. Calcd. for C<sub>32</sub>H<sub>72</sub>B<sub>20</sub>Cl<sub>2</sub>Cu<sub>2</sub>O<sub>8</sub>P<sub>4</sub>Ru<sub>2</sub>: C, 29.00; H, 5.48.

### Synthesis of [(POBBOP)(Ru)(CO)<sub>2</sub>(Au)(Cl)]<sub>2</sub> complex (**2-Au**)

A solution of Au(SMe<sub>2</sub>)Cl (0.026 g; 0.088 mmol) in CH<sub>2</sub>Cl<sub>2</sub> (3 mL) was added to a solution of (POBBOP)Ru(CO)<sub>2</sub> (0.050 g; 0.088 mmol) in CH<sub>2</sub>Cl<sub>2</sub> (3 mL). The reaction mixture was stirred at room temperature overnight. The resulting solution was dried under vacuum, triturated with hexanes (3 × 1 mL) and acetonitrile (1mL), and filtered. The CH<sub>2</sub>Cl<sub>2</sub> extract was evaporated producing a white solid. Yield: 0.061 g, 0.036 mmol, 81%.

$^1\text{H NMR}$  ( $\text{CD}_2\text{Cl}_2$ ):  $\delta$  2.51 (m, 4H, (PCH(CH<sub>3</sub>)<sub>2</sub>), 1.30 (m, 12H, (PCH(CH<sub>3</sub>)<sub>2</sub>), 1.21 (m, 6H, (PCH(CH<sub>3</sub>)<sub>2</sub>), 1.07 (m, 6H, (PCH(CH<sub>3</sub>)<sub>2</sub>)).  $^{11}\text{B}\{^1\text{H}\}$  ( $\text{CD}_2\text{Cl}_2$ ):  $\delta$  2.1 (B-Ru), -9.7 (B-Au), -11.7 (B-H), -13.1 (B-H), -15.6 (B-H), -16.8 (B-H).  $^{13}\text{C}$  ( $\text{CD}_2\text{Cl}_2$ ):  $\delta$  109.0 ( $\text{C}_2\text{B}_{10}\text{H}_{10}$ ), 36.3 (PCH(CH<sub>3</sub>)<sub>2</sub>), 28.6 (PCH(CH<sub>3</sub>)<sub>2</sub>), 19.8 (PCH(CH<sub>3</sub>)<sub>2</sub>), 17.7 (PCH(CH<sub>3</sub>)<sub>2</sub>), 15.7 (PCH(CH<sub>3</sub>)<sub>2</sub>), 15.2 (PCH(CH<sub>3</sub>)<sub>2</sub>).  $^{31}\text{P}\{^1\text{H}\}$  ( $\text{CD}_2\text{Cl}_2$ ):  $\delta$  205.1. Selected bands in the IR spectrum,  $\text{cm}^{-1}$ : 2992–2878 (br, CH), 2590 (br, BH), 2038 (strong, Ru-CO), 1966 (strong, Ru-CO). Found: C, 24.38; H, 4.19. Calcd. for  $\text{C}_{32}\text{H}_{72}\text{Au}_2\text{B}_{20}\text{Cl}_2\text{O}_8\text{P}_4\text{Ru}_2$ : C, 24.14; H, 4.56.

#### Synthesis of (POBBOP)(Ru)(CO)<sub>2</sub>(Ag)(CH<sub>3</sub>CN)(NO<sub>3</sub>) complex (2-Ag)

A portion of  $\text{AgNO}_3$  (0.015 g; 0.088 mmol) was added to a solution of (POBBOP)Ru(CO)<sub>2</sub> (0.050 g; 0.089 mmol) in  $\text{C}_6\text{D}_6$  (1 mL) and  $\text{CH}_2\text{Cl}_2$  (1 mL). The reaction mixture was then transferred to a J Young valve NMR tube and heated for 12 hours at 50 °C. The resulting solution was dried under vacuum, triturated with hexanes (3 × 1 mL) and acetonitrile (1mL), and filtered. The  $\text{CH}_2\text{Cl}_2$  extract was evaporated producing a white solid. Yield: 0.045 g, 0.061 mmol, 70%.

$^1\text{H NMR}$  ( $\text{C}_6\text{D}_6$ ):  $\delta$  1.97 (br, 2H, (PCH(CH<sub>3</sub>)<sub>2</sub>), 1.85 (br, 2H, (PCH(CH<sub>3</sub>)<sub>2</sub>), 1.04 (m, 6H, (PCH(CH<sub>3</sub>)<sub>2</sub>), 0.78 (m, 12H, (PCH(CH<sub>3</sub>)<sub>2</sub>), 0.65 (m, 6H, (PCH(CH<sub>3</sub>)<sub>2</sub>)).  $^{11}\text{B}\{^1\text{H}\}$  ( $\text{C}_6\text{D}_6$ ):  $\delta$  -2.7 (B-Ru), -11.9 (B-Ag), -12.8 (B-H), -15.0 (B-H), -15.4 (B-H).  $^{13}\text{C}$  ( $\text{C}_6\text{D}_6$ ):  $\delta$  199.5 (Ru-CO), 196.8 (Ru-CO), 117.5 ( $\text{CH}_3\text{CN}$ ) 111.4 ( $\text{C}_2\text{B}_{10}\text{H}_{10}$ ), 35.2 (PCH(CH<sub>3</sub>)<sub>2</sub>), 30.5 (PCH(CH<sub>3</sub>)<sub>2</sub>), 17.8 (PCH(CH<sub>3</sub>)<sub>2</sub>), 15.5 (PCH(CH<sub>3</sub>)<sub>2</sub>), 0.7 ( $\text{CH}_3\text{CN}$ ).  $^{31}\text{P}\{^1\text{H}\}$  ( $\text{C}_6\text{D}_6$ ):  $\delta$  205.5. Selected bands in the IR spectrum,  $\text{cm}^{-1}$ : 2971–2882 (br, CH), 2594 (br, BH), 2283 (br, Ru-NCCH<sub>3</sub>), 2038 (strong, Ru-CO), 1995 (strong, Ru-CO).

Found: C, 28.35; H, 4.84; N, 3.21. Calcd. for  $\text{C}_{18}\text{H}_{39}\text{AgB}_{10}\text{N}_2\text{O}_7\text{P}_2\text{Ru}$ : C, 27.91; H, 5.08; N, 3.62.

#### References:

1. Eleazer, B. J.; Smith, M. D.; Popov, A. A.; Peryshkov, D. V. *J. Am. Chem. Soc.*, **2016**, *138*, 10531–10538.

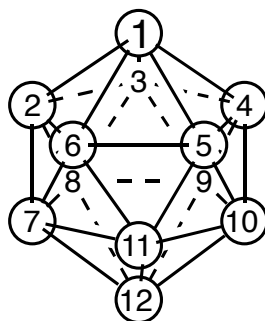

Figure S-1. The numbering scheme for the icosahedral *closo*-carborane cluster. For the  $m\text{-C}_2\text{B}_{10}\text{H}_{12}$ , carbon atoms are at positions 1 and 7.



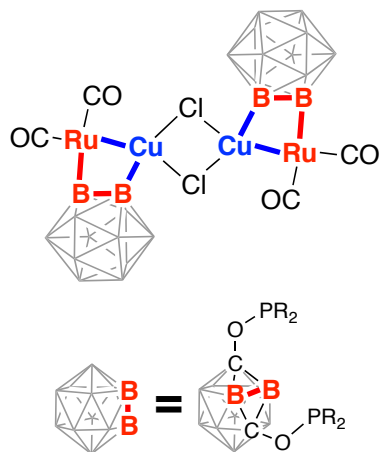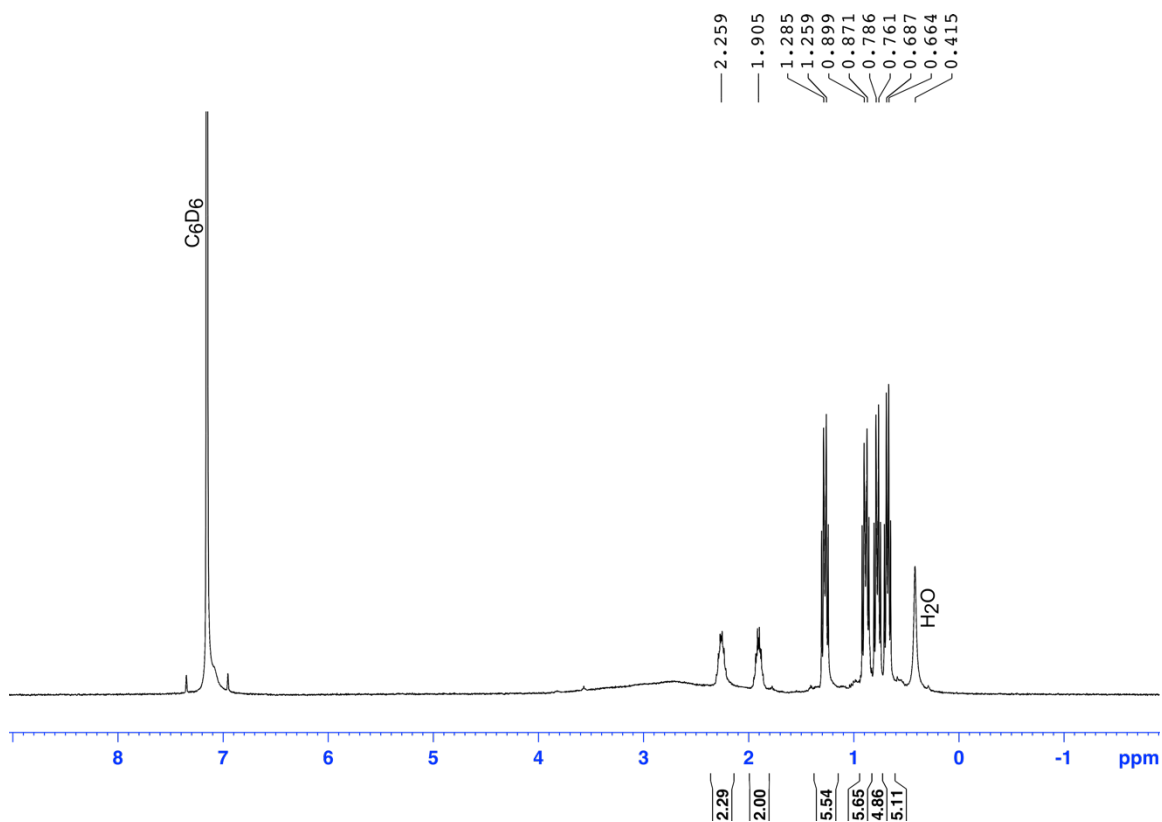

Figure S-2. The  $^1\text{H}$  NMR spectrum of  $[(\text{POBBOP})(\text{Ru})(\text{CO})_2(\text{Cu})(\text{Cl})]_2$  (**2-Cu**) in  $\text{C}_6\text{D}_6$ .

$^1\text{H}$  NMR ( $\text{C}_6\text{D}_6$ ):  $\delta$  2.26 (br, 2H, (PCH( $\text{CH}_3$ ) $_2$ )), 1.91 (br, 2H, (PCH( $\text{CH}_3$ ) $_2$ )), 1.29 (m, 6H, (PCH( $\text{CH}_3$ ) $_2$ )), 0.87 (m, 6H, (PCH( $\text{CH}_3$ ) $_2$ )), 0.76 (m, 6H, (PCH( $\text{CH}_3$ ) $_2$ )), 0.66 (m, 6H, (PCH( $\text{CH}_3$ ) $_2$ )).

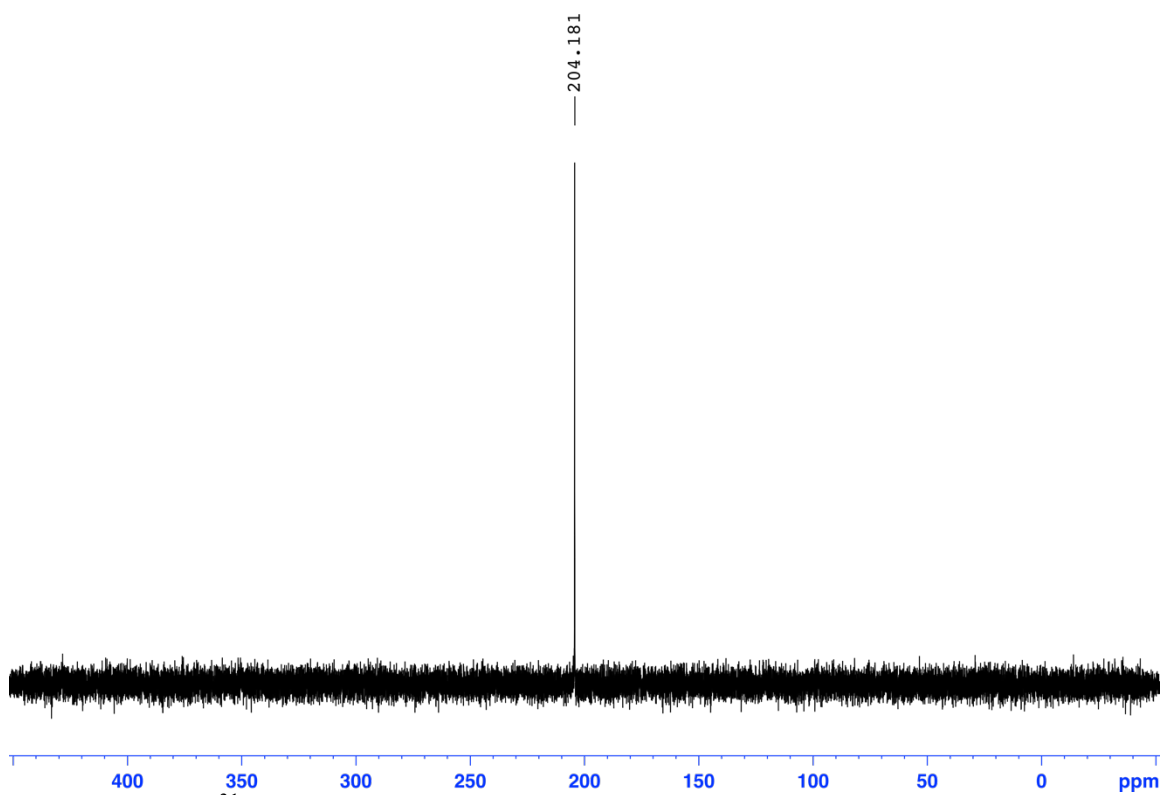

Figure S-3. The <sup>31</sup>P NMR spectrum of [(POBBOP)(Ru)(CO)<sub>2</sub>(Cu)(Cl)]<sub>2</sub> (**2-Cu**) in C<sub>6</sub>D<sub>6</sub>.

<sup>31</sup>P{<sup>1</sup>H} (C<sub>6</sub>D<sub>6</sub>): δ 204.2.

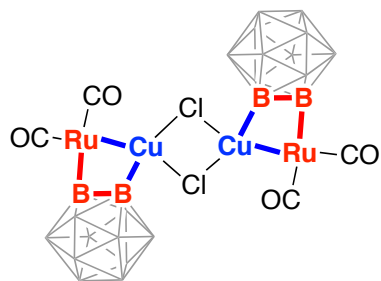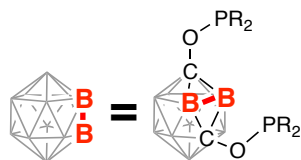

— -1.560  
 — -10.324  
 — -12.179  
 — -15.006  
 — -16.060

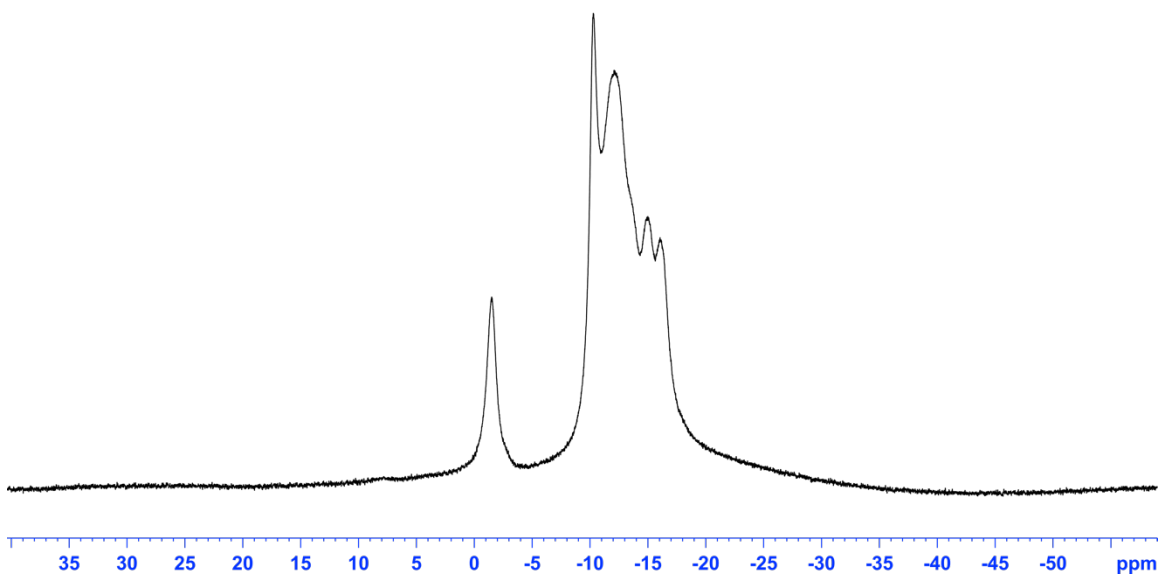

Figure S-4. The  $^{11}\text{B}$  NMR spectrum of  $[(\text{POBBOP})(\text{Ru})(\text{CO})_2(\text{Cu})(\text{Cl})]_2$  (**2-Cu**) in  $\text{C}_6\text{D}_6$ .

$^{11}\text{B}\{^1\text{H}\}$  ( $\text{C}_6\text{D}_6$ ):  $\delta$  -1.5 (B-Ru), -10.3 (B-Cu), -11.0 (B-H), -12.2 (B-H), -12.9 (B-H), -15.5 (B-H).

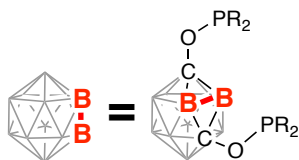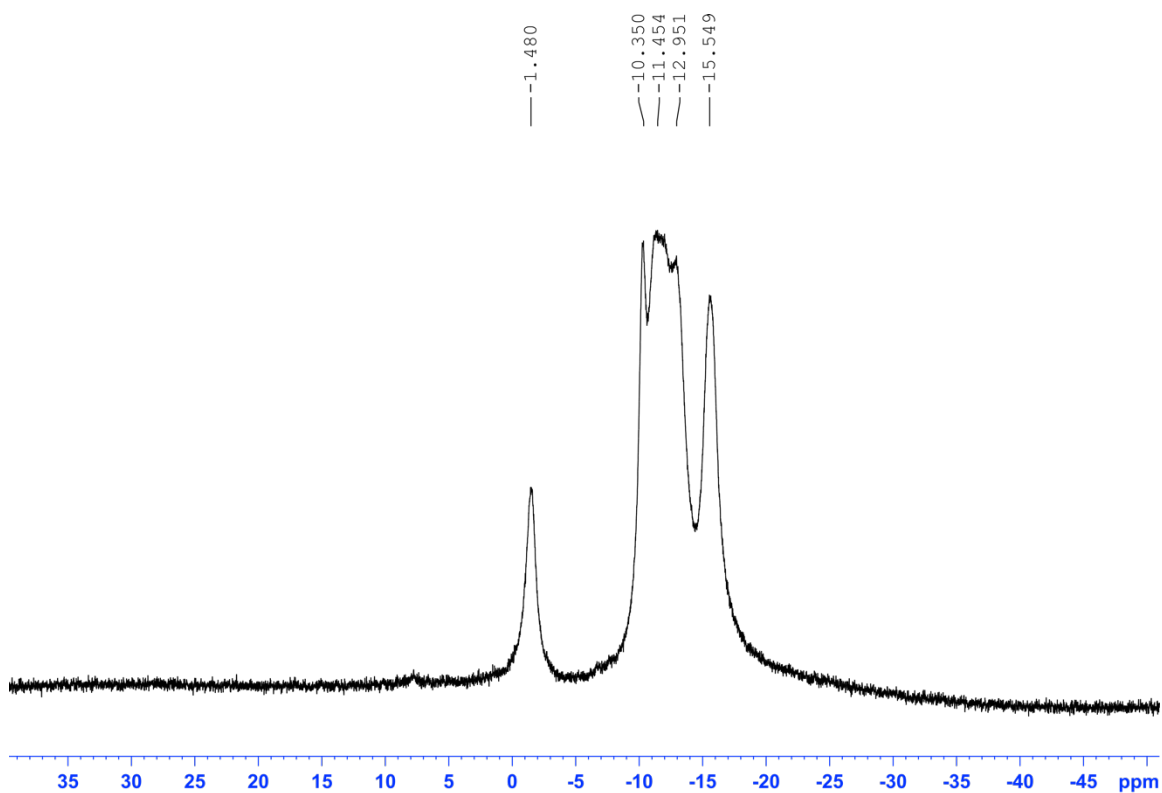

Figure S-5. The  $^{11}\text{B}\{^1\text{H}\}$  NMR spectrum of  $[(\text{POBBOP})(\text{Ru})(\text{CO})_2(\text{Cu})(\text{Cl})]_2$  (**2-Cu**) in  $\text{C}_6\text{D}_6$ .

$^{11}\text{B}\{^1\text{H}\}$  ( $\text{C}_6\text{D}_6$ ):  $\delta$  -1.5 (B-Ru), -10.3 (B-Cu), -11.0 (B-H), -12.2 (B-H), -12.9 (B-H), -15.5 (B-H).

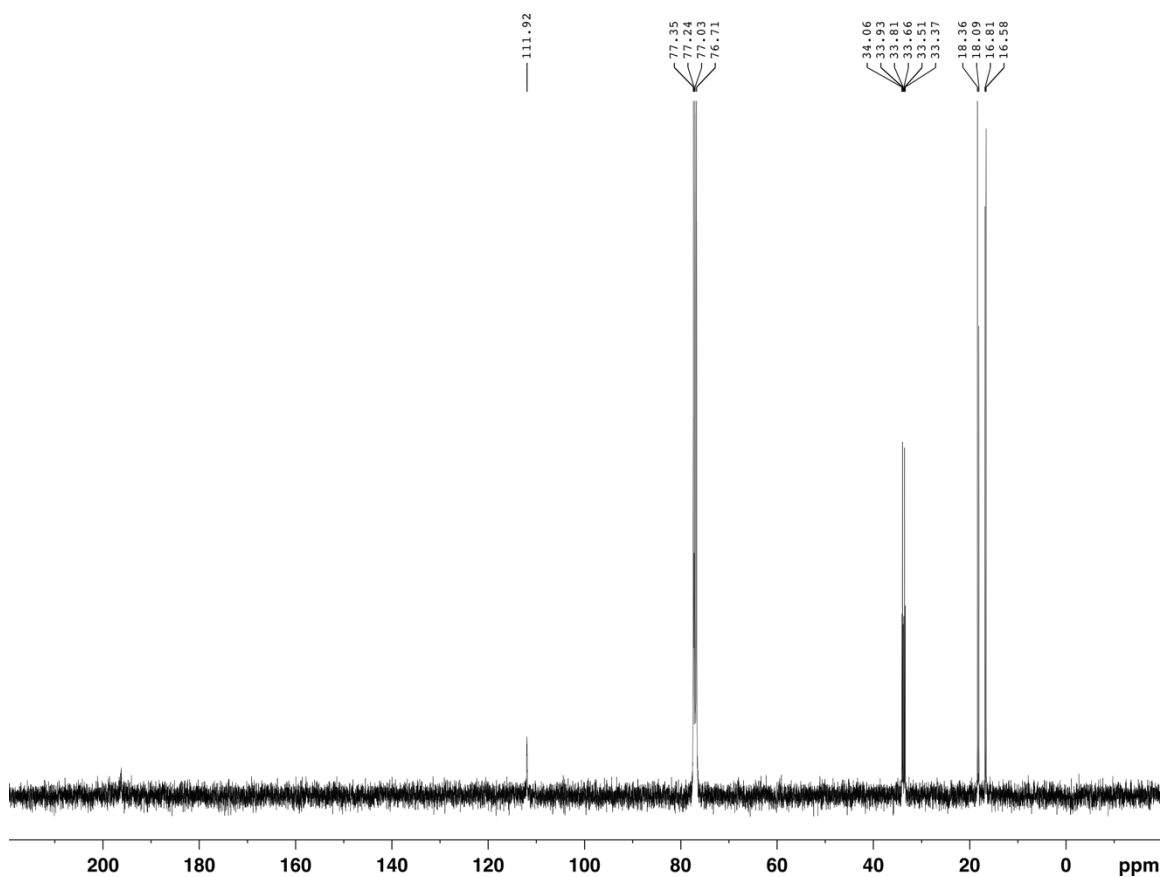

Figure S-6. The  $^{13}\text{C}$  NMR spectrum of  $[(\text{POBBOP})(\text{Ru})(\text{CO})_2(\text{Cu})(\text{Cl})]_2$  (**2-Cu**) in  $\text{C}_6\text{D}_6$ .

$^{13}\text{C}$  ( $\text{CDCl}_3$ ):  $\delta$  111.9 ( $\text{C}_2\text{B}_{10}\text{H}_{10}$ ), 33.7 ( $\text{PCH}(\text{CH}_3)_2$ ), 18.1 ( $\text{PCH}(\text{CH}_3)_2$ ), 16.8 ( $\text{PCH}(\text{CH}_3)_2$ ).

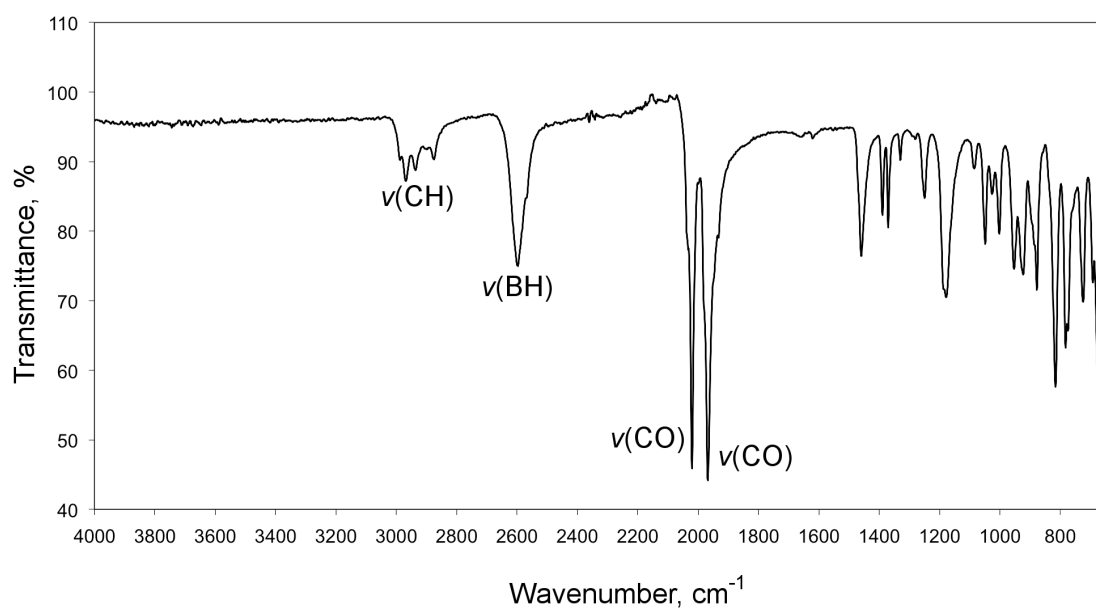

Figure S-7. The ATR-FTIR absorption spectrum of a solid sample of  $[(\text{POBBOP})(\text{Ru})(\text{CO})_2(\text{Cu})(\text{Cl})]_2$  (**2-Cu**).

Selected bands in the IR spectrum,  $\text{cm}^{-1}$ : 2990–2880 (br, CH), 2600 (br, BH), 2020 (strong, Ru-CO), 1969 (strong, Ru-CO).

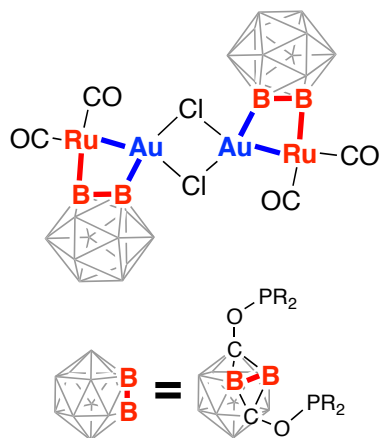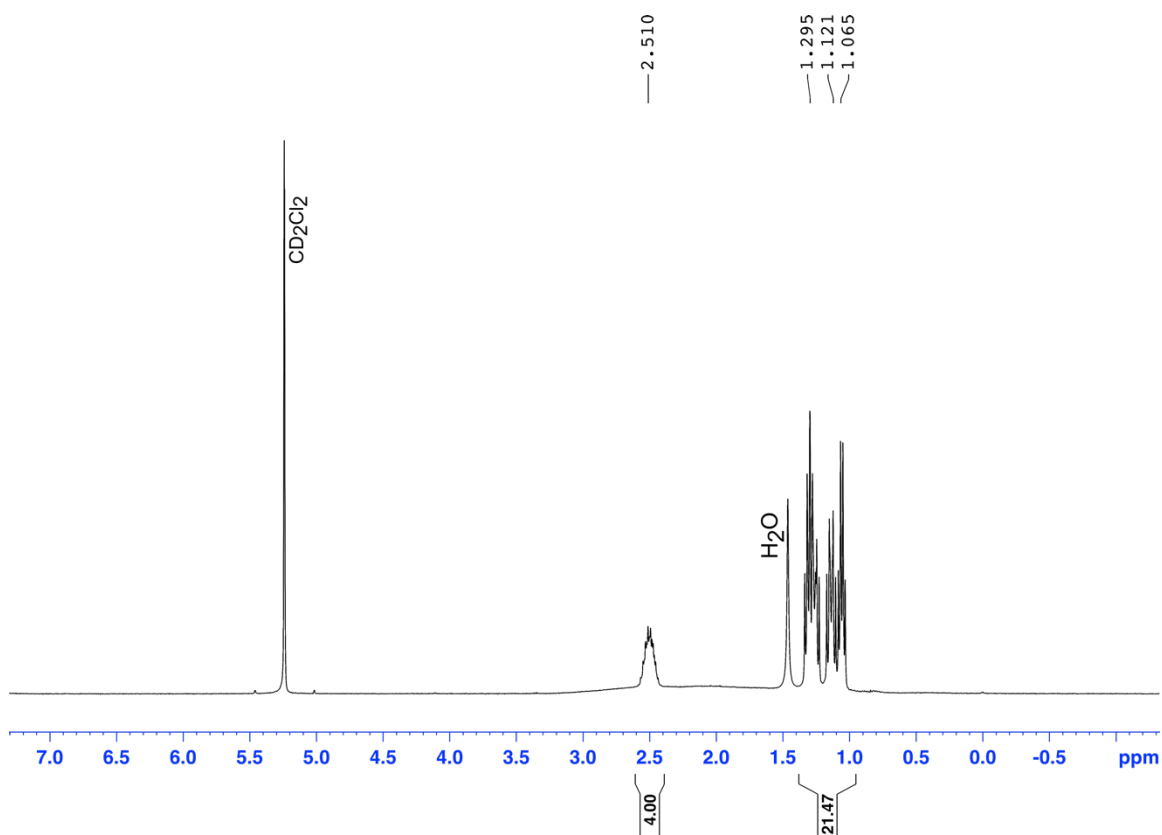

Figure S-8. The  $^1\text{H}$  NMR spectrum of  $[(\text{POBBOP})(\text{Ru})(\text{CO})_2(\text{Au})(\text{Cl})_2]_2$  (**2-Au**) in  $\text{CD}_2\text{Cl}_2$ .

$^1\text{H}$  NMR ( $\text{CD}_2\text{Cl}_2$ ):  $\delta$  2.51 (m, 4H, ( $\text{PCH}(\text{CH}_3)_2$ ), 1.30 (m, 12H, ( $\text{PCH}(\text{CH}_3)_2$ ), 1.21 (m, 6H, ( $\text{PCH}(\text{CH}_3)_2$ ), 1.07 (m, 6H, ( $\text{PCH}(\text{CH}_3)_2$ ).

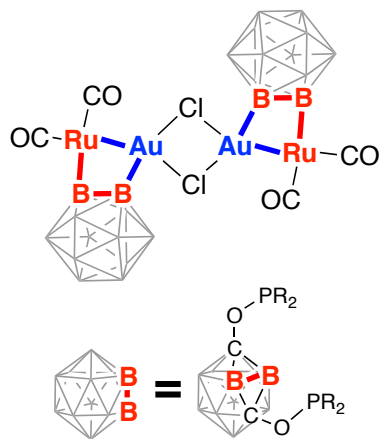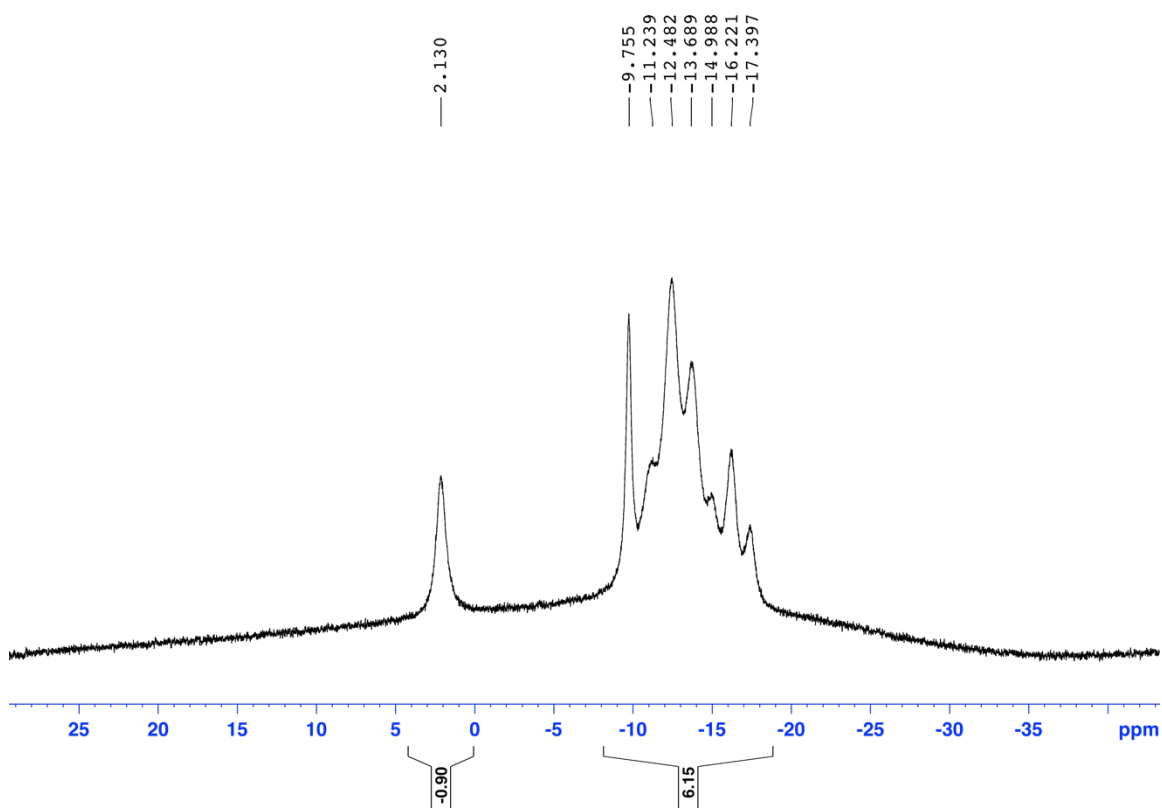

Figure S-9. The  $^{11}\text{B}$  NMR spectrum of  $[(\text{POBBOP})\text{Ru}(\text{CO})_2(\text{Au})(\text{Cl})]_2$  (2-Au) in  $\text{CD}_2\text{Cl}_2$ .

$^{11}\text{B}\{^1\text{H}\}$  ( $\text{CD}_2\text{Cl}_2$ ):  $\delta$  2.1 ( $B\text{-Ru}$ ), -9.7 ( $B\text{-Au}$ ), -11.7 ( $B\text{-H}$ ), -13.1 ( $B\text{-H}$ ), -15.6 ( $B\text{-H}$ ), -16.8 ( $B\text{-H}$ ).



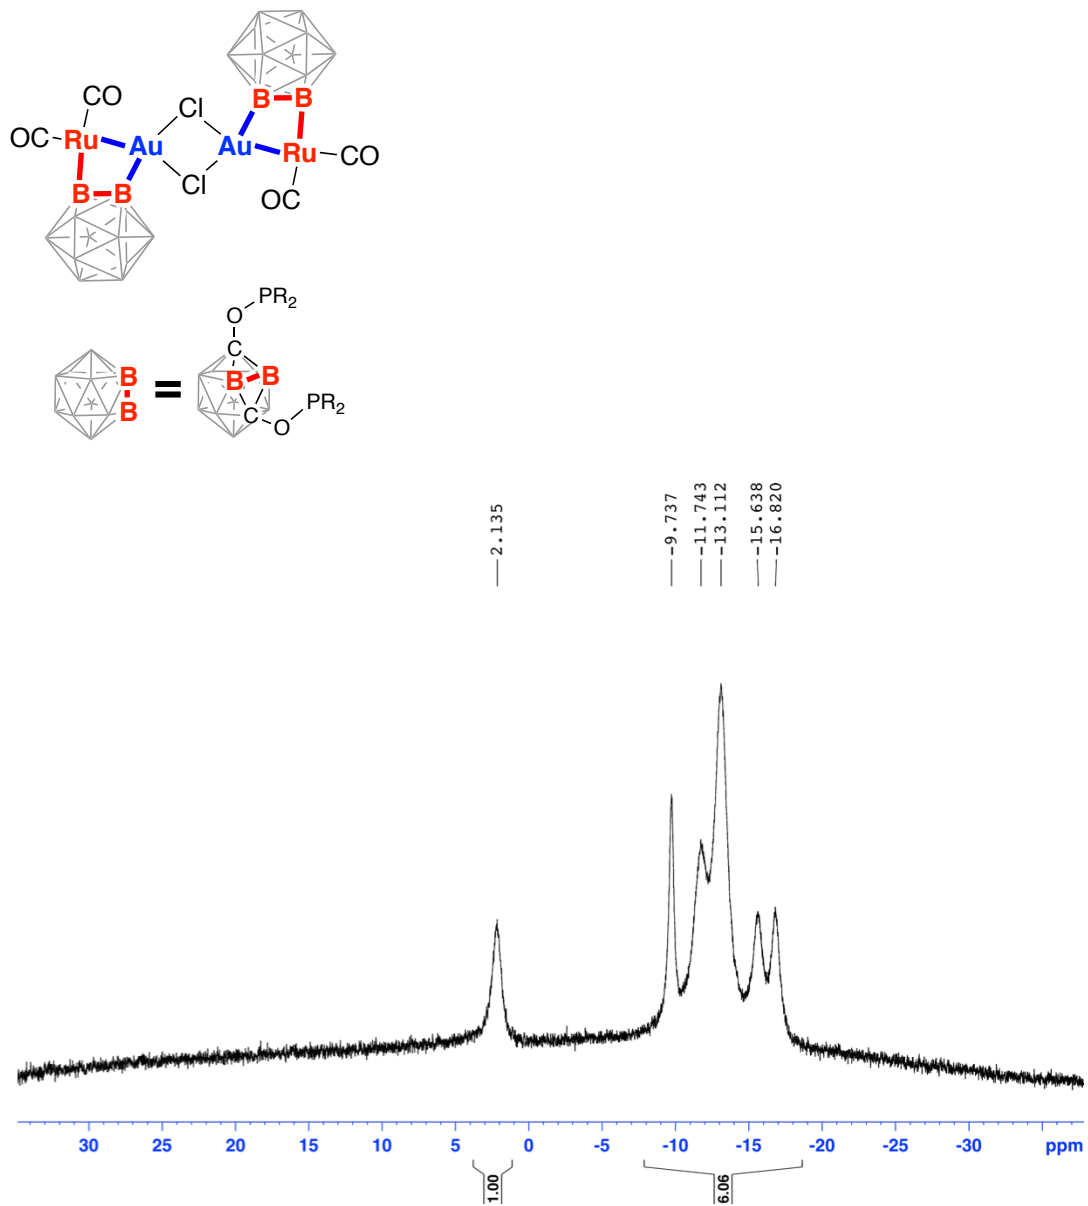

Figure S-10. The  $^{11}\text{B}\{^1\text{H}\}$  NMR spectrum of  $[(\text{POBBOP})(\text{Ru})(\text{CO})_2(\text{Au})(\text{Cl})]_2$  (**2-Au**) in  $\text{CD}_2\text{Cl}_2$ .

$^{11}\text{B}\{^1\text{H}\}$  ( $\text{CD}_2\text{Cl}_2$ ):  $\delta$  2.1 (*B*-Ru), -9.7 (*B*-Au), -11.7 (*B*-H), -13.1 (*B*-H), -15.6 (*B*-H), -16.8 (*B*-H).

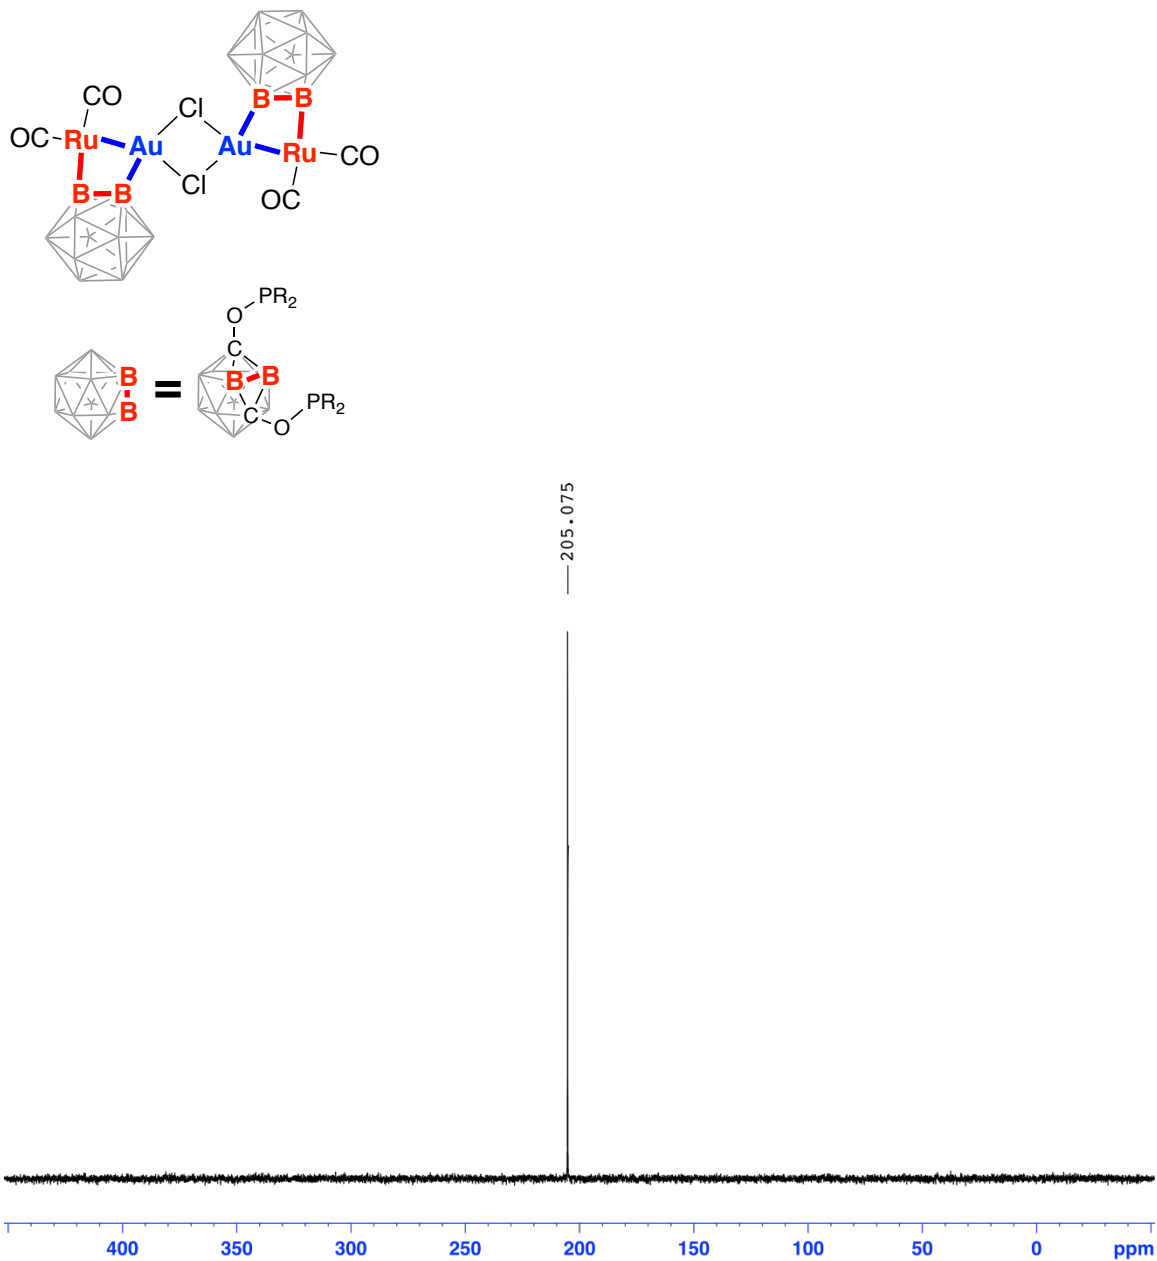

Figure S-11. The  $^{31}\text{P}$  NMR spectrum of  $[(\text{POBBOP})(\text{Ru})(\text{CO})_2(\text{Au})(\text{Cl})]_2$  (**2-Au**) in  $\text{CD}_2\text{Cl}_2$ .

$^{31}\text{P}\{\text{H}\}$  ( $\text{CD}_2\text{Cl}_2$ ):  $\delta$  205.1

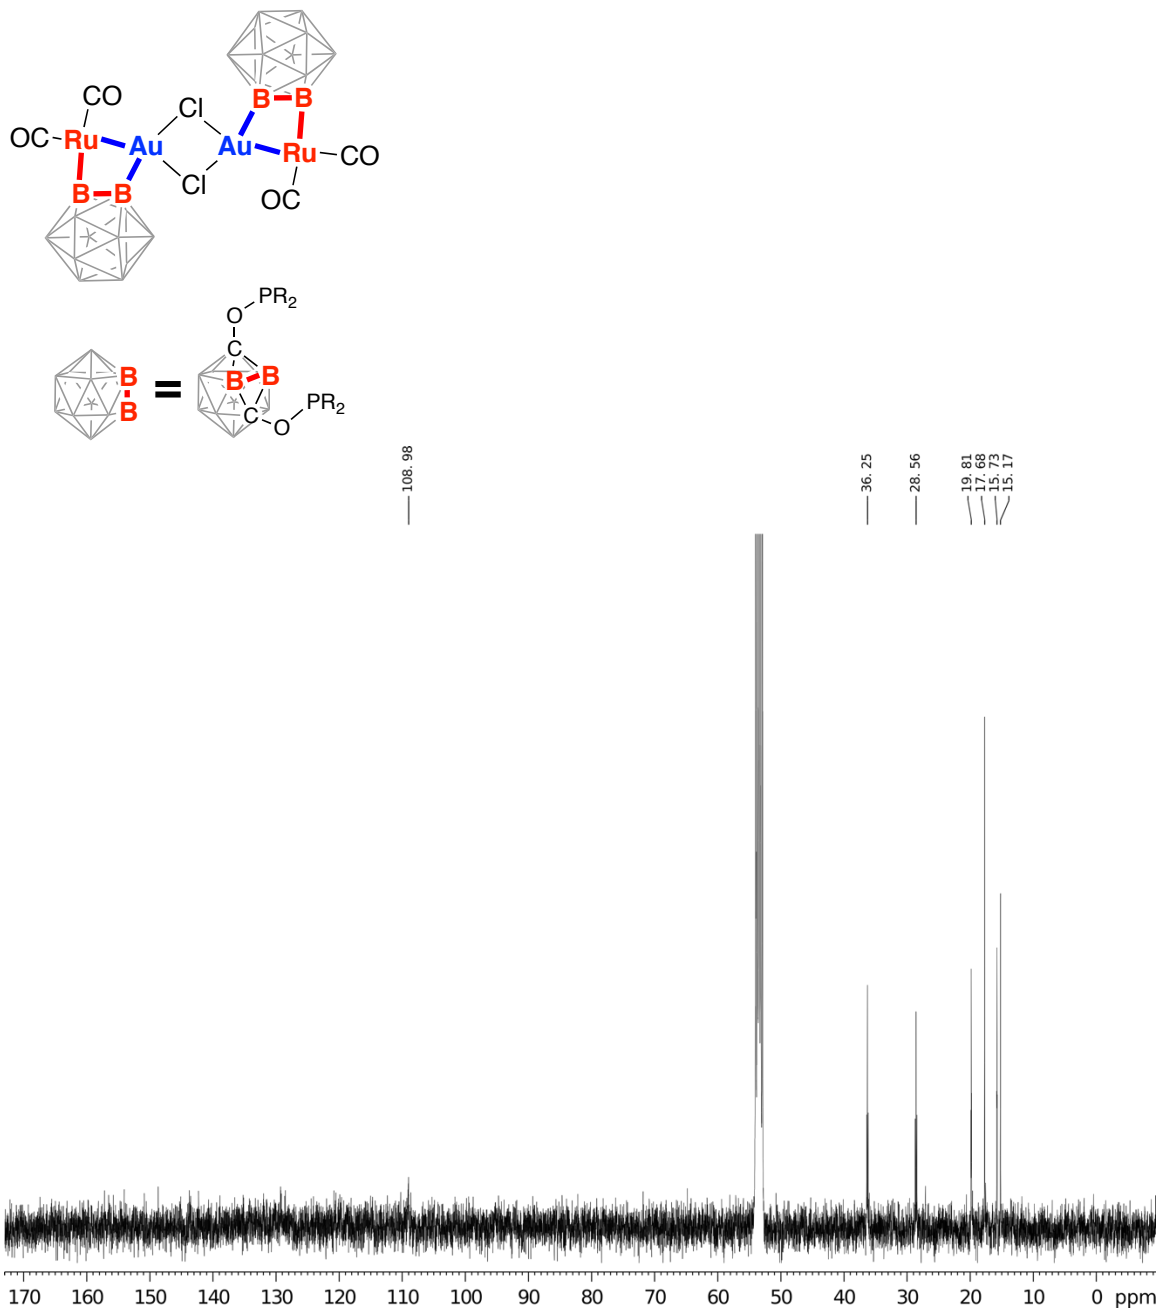

Figure S-12. The  $^{13}\text{C}$  NMR spectrum of  $[(\text{POBBOP})(\text{Ru})(\text{CO})_2(\text{Au})(\text{Cl})]_2$  (**2-Au**) in  $\text{CD}_2\text{Cl}_2$ .

$^{13}\text{C}$  ( $\text{CD}_2\text{Cl}_2$ ):  $\delta$  109.0 ( $\text{C}_2\text{B}_{10}\text{H}_{10}$ ), 36.3 ( $\text{PCH}(\text{CH}_3)_2$ ), 28.6 ( $\text{PCH}(\text{CH}_3)_2$ ), 19.8 ( $\text{PCH}(\text{CH}_3)_2$ ), 17.7 ( $\text{PCH}(\text{CH}_3)_2$ ), 15.7 ( $\text{PCH}(\text{CH}_3)_2$ ), 15.2 ( $\text{PCH}(\text{CH}_3)_2$ )

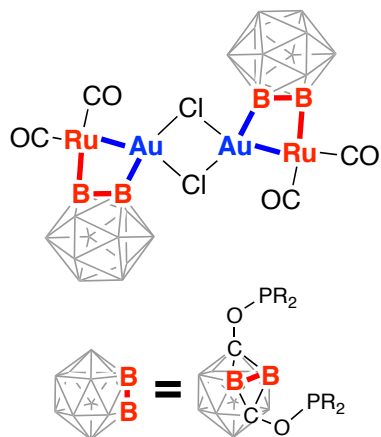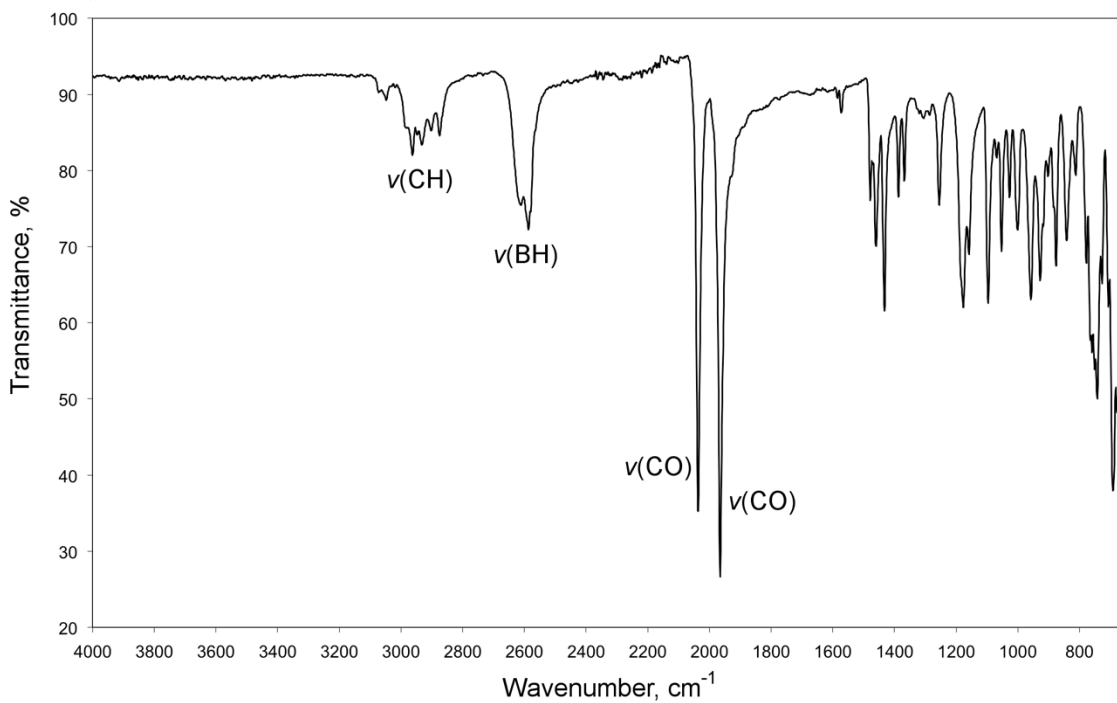

Figure S-13. The ATR-FTIR absorption spectrum of a solid sample of  $[(\text{POBBOP})(\text{Ru})(\text{CO})_2(\text{Au})(\text{Cl})]_2$  (**2-Au**).

Selected bands in the IR spectrum,  $\text{cm}^{-1}$ : 2992–2878 (br, CH), 2590 (br, BH), 2038 (strong, Ru-CO), 1966 (strong, Ru-CO).

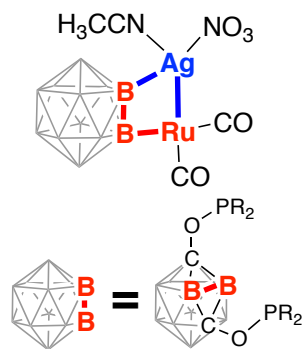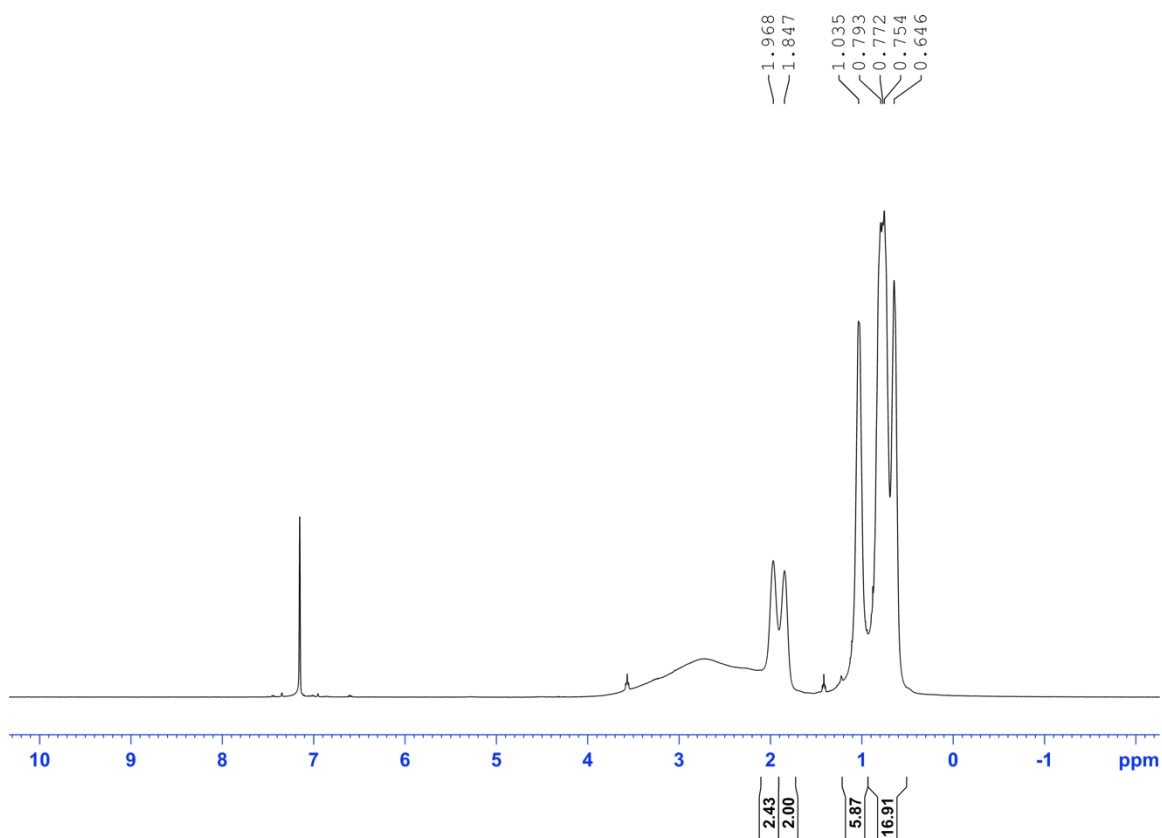

Figure S-14. The  $^1\text{H}$  NMR spectrum of  $(\text{POBBOP})(\text{Ru})(\text{CO})_2(\text{Ag})(\text{CH}_3\text{CN})(\text{NO}_3)$  (**2-Ag**) in  $\text{C}_6\text{D}_6$ .

$^1\text{H}$  NMR ( $\text{C}_6\text{D}_6$ ):  $\delta$  1.97 (br, 2H,  $(\text{PCH}(\text{CH}_3)_2)$ ), 1.85 (br, 2H,  $(\text{PCH}(\text{CH}_3)_2)$ ), 1.04 (m, 6H,  $(\text{PCH}(\text{CH}_3)_2)$ ), 0.78 (m, 12H,  $(\text{PCH}(\text{CH}_3)_2)$ ), 0.65 (m, 6H,  $(\text{PCH}(\text{CH}_3)_2)$ ).

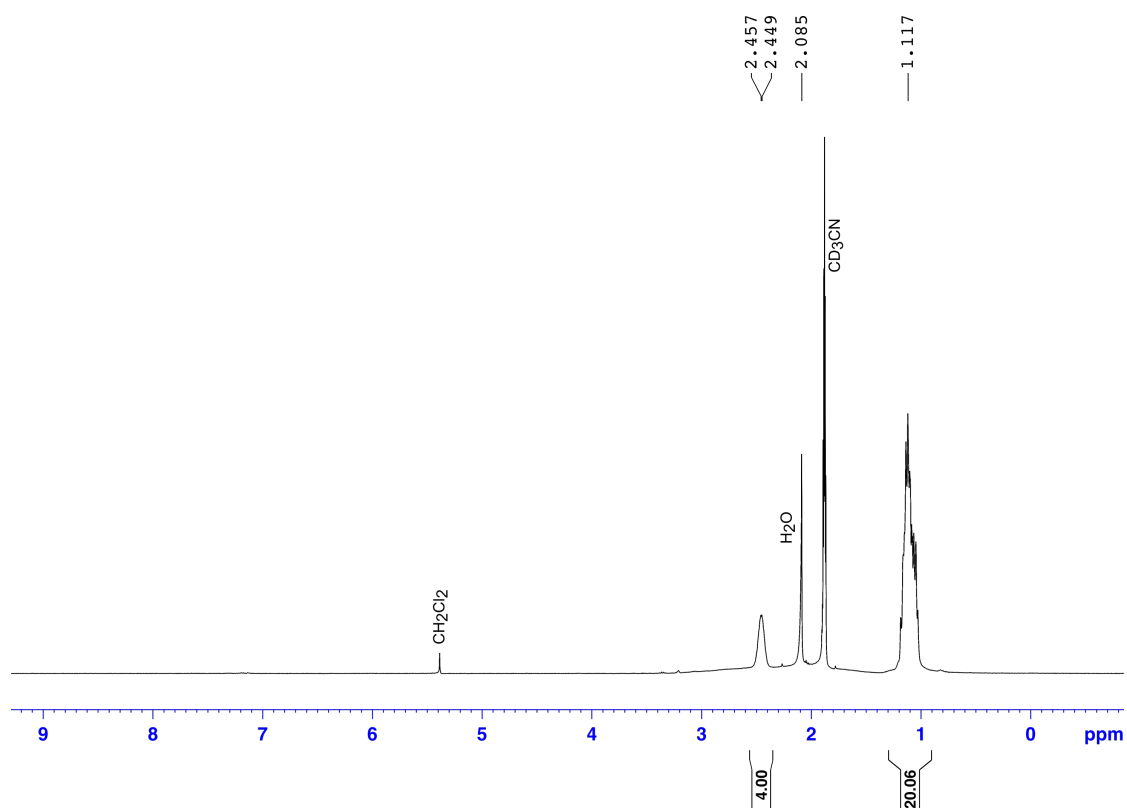

Figure S-14A. The  $^1\text{H}$  NMR spectrum of  $(\text{POBBOP})(\text{Ru})(\text{CO})_2(\text{Ag})(\text{CH}_3\text{CN})(\text{NO}_3)$  (**2-Ag**) in  $\text{CD}_3\text{CN}$ .

$^1\text{H}$  NMR ( $\text{CD}_3\text{CN}$ ):  $\delta$  2.45 (br, 4H,  $(\text{PCH}(\text{CH}_3)_2)$ ), 1.12 (m, 24H,  $(\text{PCH}(\text{CH}_3)_2)$ ).

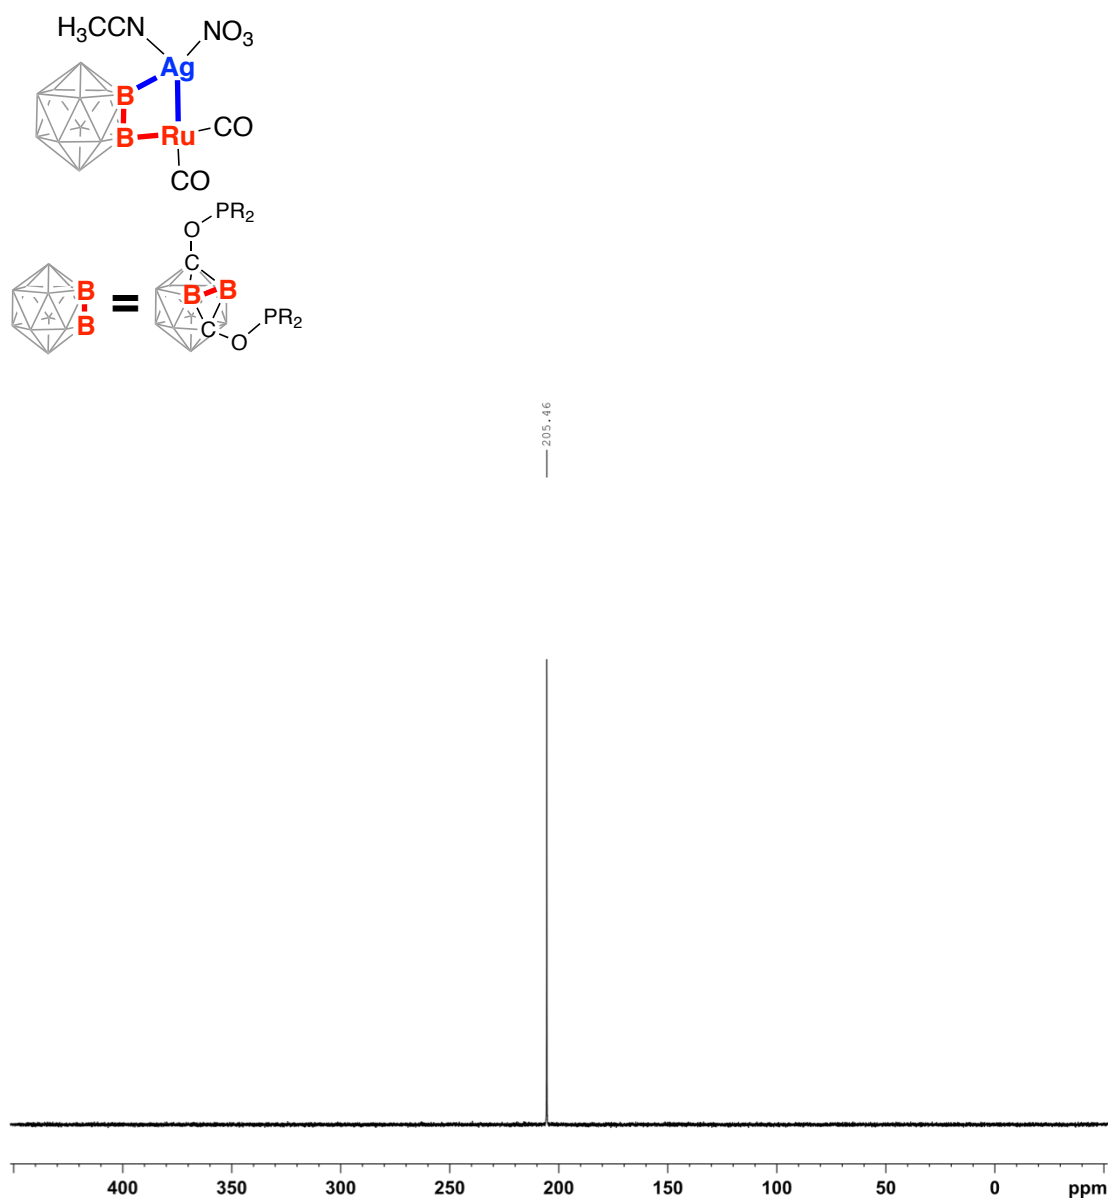

Figure S-15. The <sup>31</sup>P NMR spectrum of (POBBOP)(Ru)(CO)<sub>2</sub>(Ag)(CH<sub>3</sub>CN)(NO<sub>3</sub>) (**2-Ag**) in C<sub>6</sub>D<sub>6</sub>.

<sup>31</sup>P{<sup>1</sup>H} (C<sub>6</sub>D<sub>6</sub>): δ 205.5.

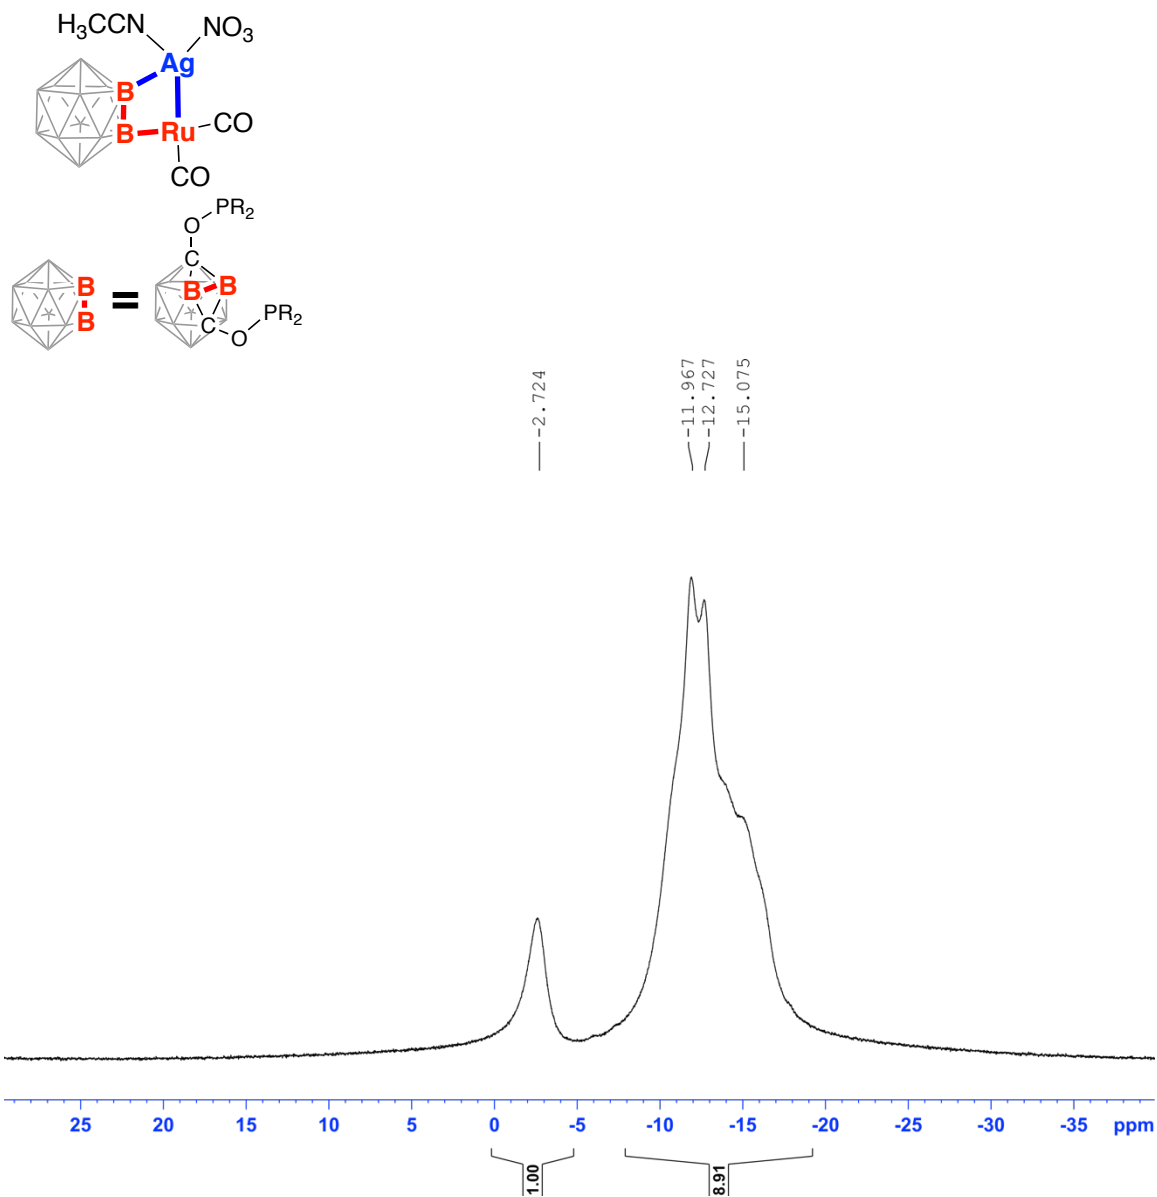

Figure S-16. The <sup>11</sup>B NMR spectrum of (POBBOP)(Ru)(CO)<sub>2</sub>(Ag)(CH<sub>3</sub>CN)(NO<sub>3</sub>) (**2-Ag**) in C<sub>6</sub>D<sub>6</sub>.

<sup>11</sup>B{<sup>1</sup>H} (C<sub>6</sub>D<sub>6</sub>): δ -2.7 (*B*-Ru), -11.9 (*B*-Ag), -12.8 (*B*-H), -15.0 (*B*-H), -15.4 (*B*-H)



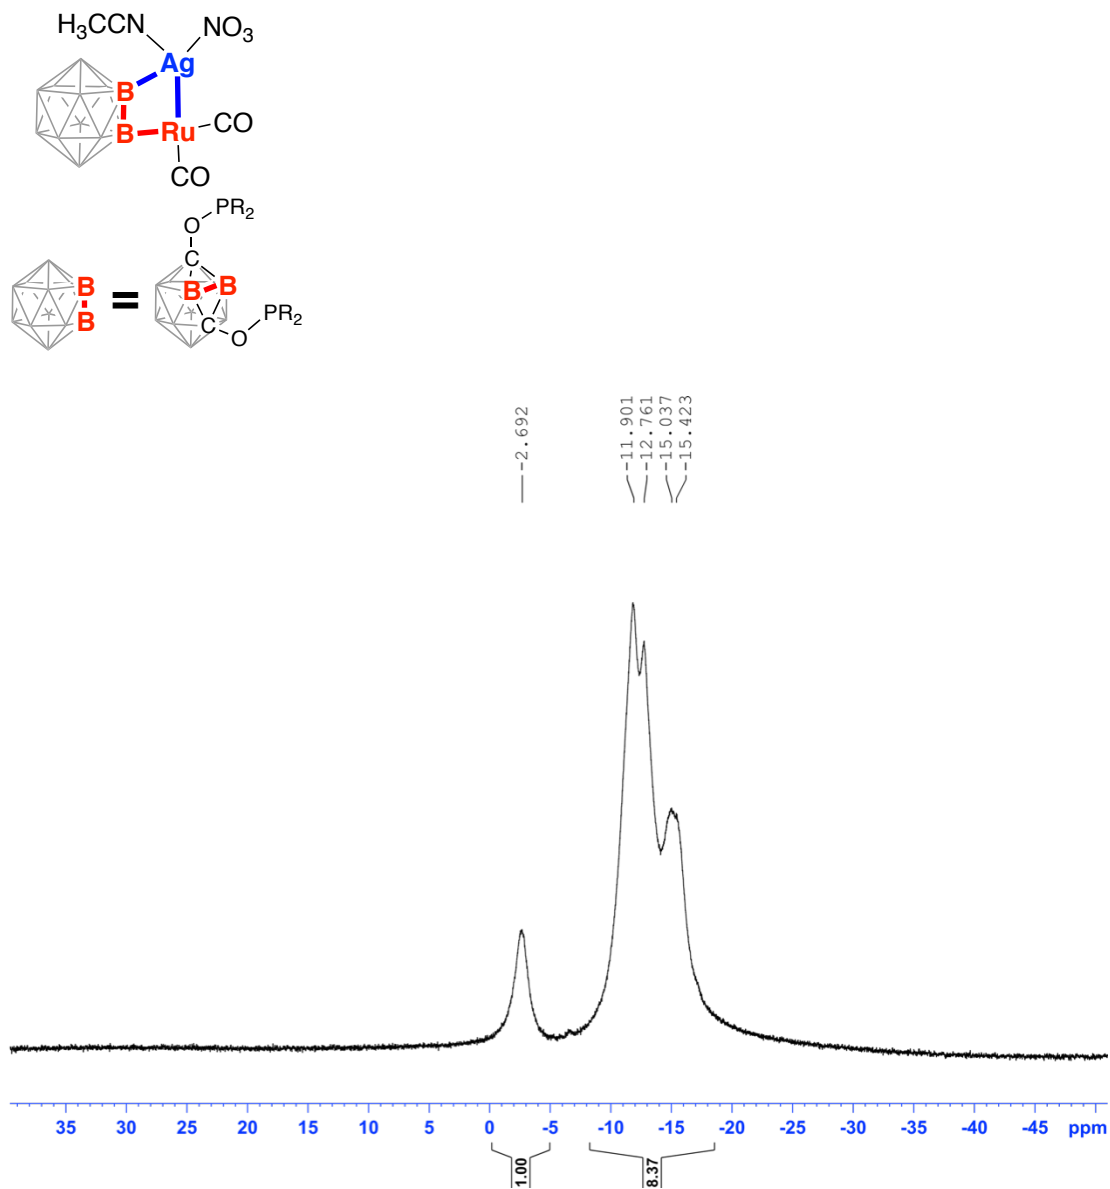

Figure S-17. The  $^{11}\text{B}\{^1\text{H}\}$  NMR spectrum of  $(\text{POBBOP})(\text{Ru})(\text{CO})_2(\text{Ag})(\text{CH}_3\text{CN})(\text{NO}_3)$  (**2-Ag**) in  $\text{C}_6\text{D}_6$ .

$^{11}\text{B}\{^1\text{H}\}$  ( $\text{C}_6\text{D}_6$ ):  $\delta$  -2.7 (*B*-Ru), -11.9 (*B*-Ag), -12.8 (*B*-H), -15.0 (*B*-H), -15.4 (*B*-H)

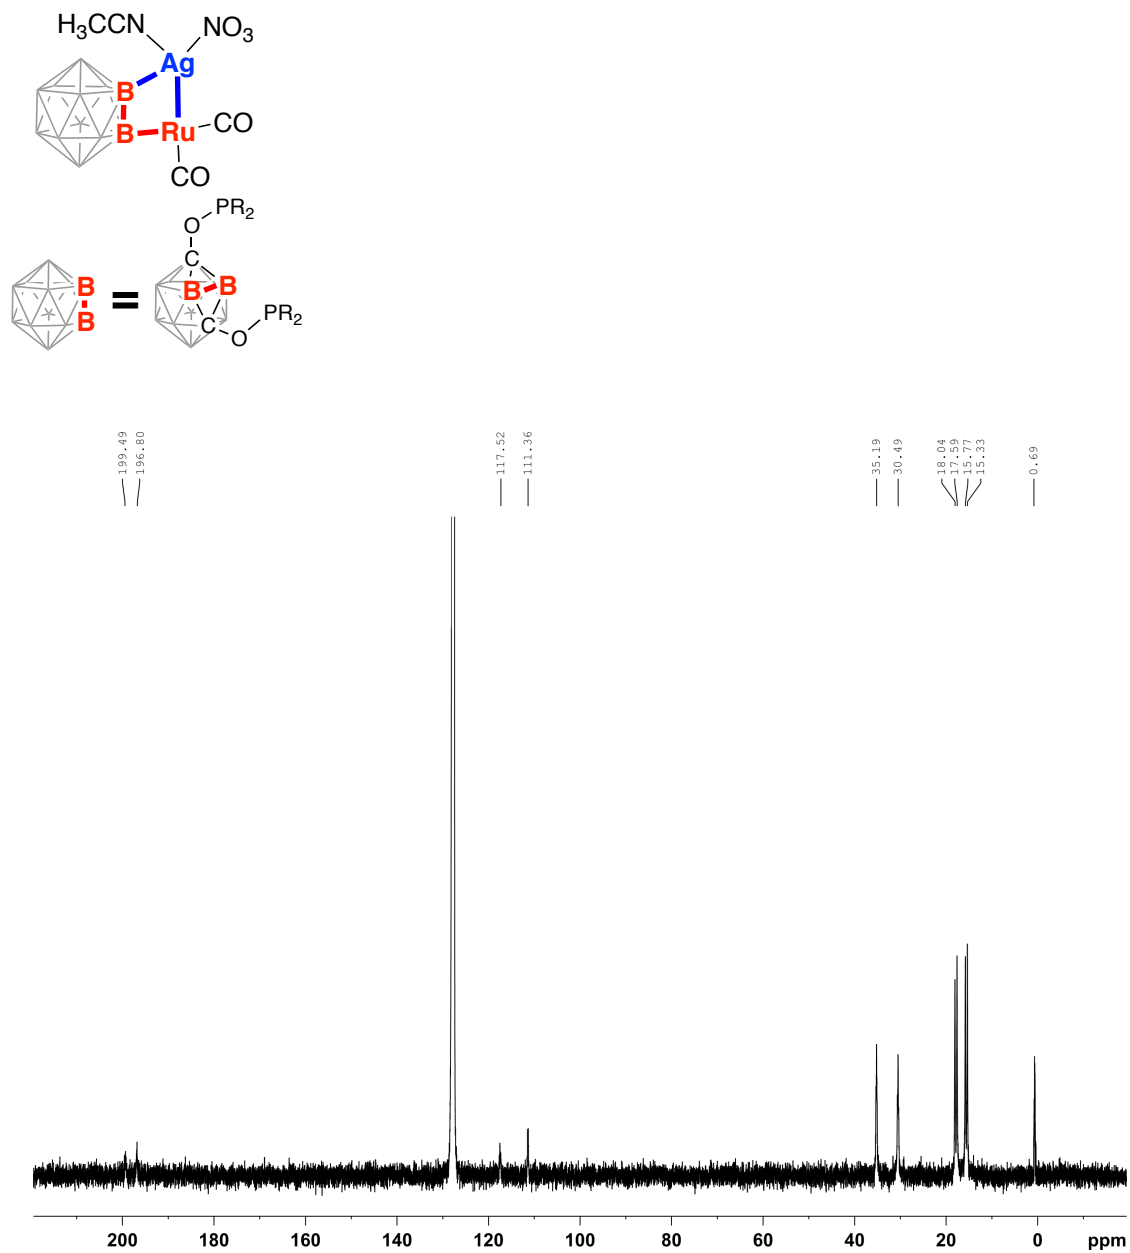

Figure S-18. The <sup>13</sup>C NMR spectrum of (POBBOP)(Ru)(CO)<sub>2</sub>(Ag)(CH<sub>3</sub>CN)(NO<sub>3</sub>) (**2-Ag**) in C<sub>6</sub>D<sub>6</sub>.

<sup>13</sup>C (C<sub>6</sub>D<sub>6</sub>): δ 199.5 (Ru-CO), 196.8 (Ru-CO), 117.5 (CH<sub>3</sub>CN), 111.4 (C<sub>2</sub>B<sub>10</sub>H<sub>10</sub>), 35.2 (PCH(CH<sub>3</sub>)<sub>2</sub>), 30.5 (PCH(CH<sub>3</sub>)<sub>2</sub>), 17.8 (PCH(CH<sub>3</sub>)<sub>2</sub>), 15.5 (PCH(CH<sub>3</sub>)<sub>2</sub>), 0.7 (CH<sub>3</sub>CN).

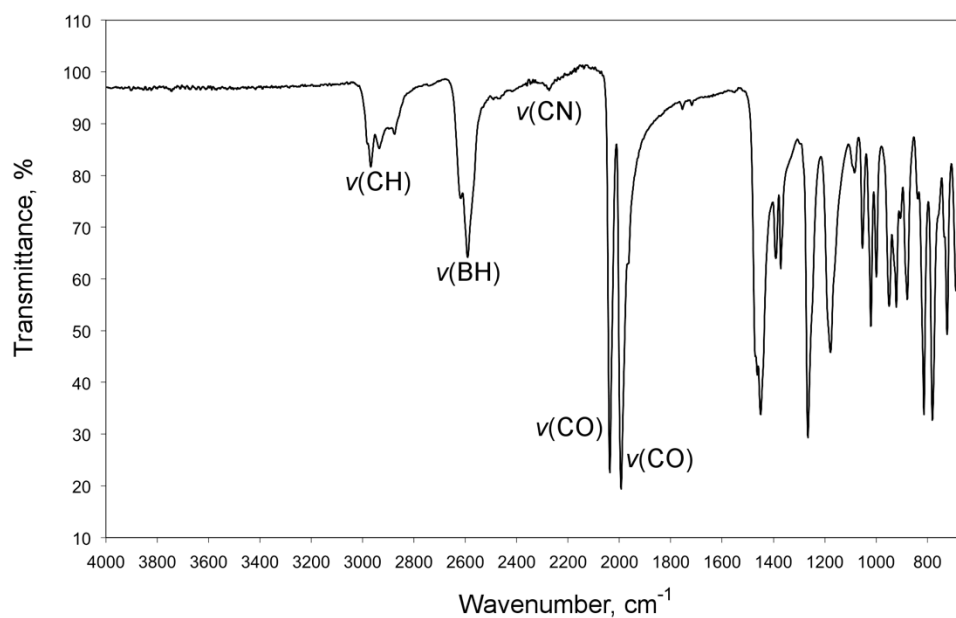

Figure S-19. The ATR-FTIR absorption spectrum of a solid sample of (POBBOP)(Ru)(CO)<sub>2</sub>(Ag)(CH<sub>3</sub>CN)(NO<sub>3</sub>) (**2-Ag**).

Selected bands in the IR spectrum, cm<sup>-1</sup>: 2971–2882 (br, CH), 2594 (br, BH), 2283 (br, Ru-NCCH<sub>3</sub>), 2038 (strong, Ru-CO), 1995 (strong, Ru-CO).

## Theoretical Calculations.

For the topological analysis of the electron density with the QTAIM approach, the structures were optimized at the PBE0/def2-TZVP approach with ZORA correction as implemented in Orca 3.0.3 suite.<sup>1,2</sup> QTAIM analysis was then performed with the use of AIMAll code,<sup>3</sup> Laplacian maps were visualized with Multiwfn 3.3.9 software,<sup>4</sup> ELF functions were computed using TopMod 09 package.<sup>5,6</sup> The optimized structures were found to be in a good agreement with crystal structures for the bimetallic complexes. The optimized model of the dimer **2-Cu** had a distortion in coordination of bridging chloride ligands that did not affect the rest of the complex including bond distances and angles for the B1–Ru1–Cu1–B2 fragment.

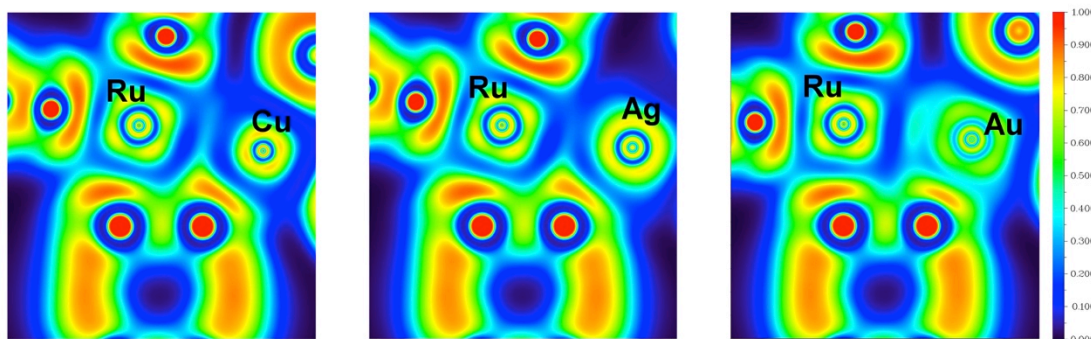

**Figure S-20.** ELF maps near the Ru–M–B2 fragment plotted in the Ru–B1–B2 plane.

**Table S-1.** ELF analysis of the bonding in the B1-Ru-M-B2 fragment. The values in the table are attractor values ( $\eta_a$ ; the maximum ELF values for each basin) and basin populations ( $\Omega$ , the number of electron per basin):  $\eta_a/\Omega$

|            | <b>2-Cu</b>            | <b>2-Ag</b> | <b>2-Au</b>            |
|------------|------------------------|-------------|------------------------|
| V(Ru,B1)   | 0.899/1.67; 0.901/1.67 | 0.905/1.68  | 0.896/1.75; 0.896/1.74 |
| V(Ru,M,B2) | 0.863/2.57; 0.865/2.57 | 0.845/2.00  |                        |
| V(Au,B2)   |                        |             | 0.833/1.93; 0.833/1.94 |
| V(Ru,Au)   |                        |             | 0.431/0.71; 0.431/0.72 |
| V(B1,B2)   | 0.699/0.36; 0.699/0.37 | 0.705/0.41  | 0.703/0.23; 0.703/0.23 |

half of the  $\Omega$  value can be tentatively correlated with the bond order

## References.

1. F. Neese, *WIREs Comput. Mol. Sci.*, 2012, **2**, 73-78.
2. D. A. Pantazis, X.-Y. Chen, C. R. Landis and F. Neese, *J. Chem. Theory Comput.*, 2008, **4**, 908-919.
3. T. A. Keith, in *AIMAll (Version 14.04.17)*, <http://aim.tkgristmill.com>, 2014.
4. T. Lu and F. Chen, *J. Comput. Chem.*, 2012, **33**, 580-592.
5. Noury, S.; Krokidis, X.; Fuster, F.; Silvi, B., Computational tools for the electron localization function topological analysis. *Computers and Chemistry* 1999, **23**, 597-604.
6. Noury, S.; Krokidis, X.; Fuster, F.; Silvi, B. TopMoD 09 package, 2009. <http://www.lct.jussieu.fr/article76.html>.

## X-Ray Structure Determination, [(POBBOP)(Ru)(CO)<sub>2</sub>(Cu)(Cl)]<sub>2</sub> (2-Cu)

X-ray intensity data from a colorless block crystal were collected at 100(2) K using a Bruker D8 QUEST diffractometer equipped with a PHOTON 100 CMOS area detector and an Incoatec microfocus source (Mo K $\alpha$  radiation,  $\lambda = 0.71073$  Å).<sup>1</sup> The raw area detector data frames were reduced and corrected for absorption effects using the SAINT+ and SADABS programs.<sup>1</sup> Final unit cell parameters were determined by least-squares refinement of 9926 reflections taken from the data set. The structure was solved by direct methods with SHELXT.<sup>2</sup> Subsequent difference Fourier calculations and full-matrix least-squares refinement against  $F^2$  were performed with SHELXL-2014<sup>2</sup> using OLEX2.<sup>3</sup>

The compound crystallizes in the monoclinic system. The pattern of systematic absences in the intensity data was consistent with the space group  $P2_1/n$ , which was confirmed by structure solution. The asymmetric unit consists of half of one {Ru(CO)<sub>2</sub>(C<sub>14</sub>H<sub>36</sub>B<sub>10</sub>O<sub>2</sub>P<sub>2</sub>)}<sub>2</sub>(CuCl)<sub>2</sub> complex, which is located on a crystallographic inversion center. All non-hydrogen atoms were refined with anisotropic displacement parameters. Hydrogen atoms bonded to carbon were located in Fourier difference maps before being placed in geometrically idealized positions included as riding atoms with  $d(\text{C-H}) = 1.00$  Å and  $U_{\text{iso}}(\text{H}) = 1.2U_{\text{eq}}(\text{C})$  for methine hydrogen atoms and  $d(\text{C-H}) = 0.98$  Å and  $U_{\text{iso}}(\text{H}) = 1.5U_{\text{eq}}(\text{C})$  for methyl hydrogens. The methyl hydrogens were allowed to rotate as a rigid group to the orientation of maximum observed electron density. Hydrogen atoms bonded to boron were located in difference maps and refined freely. The largest residual electron density peak in the final difference map is 0.47 e-/Å<sup>3</sup> located 0.91 Å from P2.

(1) APEX2 Version 2014.9-0, SAINT+ Version 8.34A and SADABS Version 2014/4. Bruker Analytical X-ray Systems, Inc., Madison, Wisconsin, USA, 2014.

(2) (a) SHELXT: Sheldrick, G.M. *Acta Cryst.* **2015**, *A71*, 3-8. (b) SHELXL: Sheldrick, G.M. *Acta Cryst.* **2008**, *A64*, 112-122.

(3) Dolomanov, O. V., Bourhis, L. J., Gildea, R. J., Howard J. A. K. and Puschmann, H. OLEX2: a complete structure solution, refinement and analysis program. *J. Appl. Cryst.* **2009**, *42*, 339-341.

Table S-2. Crystal data and structure refinement for [(POBBOP)(Ru)(CO)<sub>2</sub>(Cu)(Cl)]<sub>2</sub> (**2-Cu**)

|                                             |                                                                                                                               |
|---------------------------------------------|-------------------------------------------------------------------------------------------------------------------------------|
| Identification code                         | BE366b                                                                                                                        |
| Empirical formula                           | C <sub>32</sub> H <sub>72</sub> B <sub>20</sub> Cl <sub>2</sub> Cu <sub>2</sub> O <sub>8</sub> P <sub>4</sub> Ru <sub>2</sub> |
| Formula weight                              | 1325.09                                                                                                                       |
| Temperature/K                               | 100(2)                                                                                                                        |
| Crystal system                              | monoclinic                                                                                                                    |
| Space group                                 | P2 <sub>1</sub> /n                                                                                                            |
| a/Å                                         | 10.4786(5)                                                                                                                    |
| b/Å                                         | 16.1010(8)                                                                                                                    |
| c/Å                                         | 16.7081(8)                                                                                                                    |
| α/°                                         | 90                                                                                                                            |
| β/°                                         | 92.821(2)                                                                                                                     |
| γ/°                                         | 90                                                                                                                            |
| Volume/Å <sup>3</sup>                       | 2815.5(2)                                                                                                                     |
| Z                                           | 2                                                                                                                             |
| ρ <sub>calc</sub> /g/cm <sup>3</sup>        | 1.563                                                                                                                         |
| μ/mm <sup>-1</sup>                          | 1.523                                                                                                                         |
| F(000)                                      | 1336.0                                                                                                                        |
| Crystal size/mm <sup>3</sup>                | 0.24 × 0.2 × 0.18                                                                                                             |
| Radiation                                   | MoKα (λ = 0.71073)                                                                                                            |
| 2θ range for data collection/°              | 4.492 to 56.676                                                                                                               |
| Index ranges                                | -13 ≤ h ≤ 13, -21 ≤ k ≤ 21, -22 ≤ l ≤ 22                                                                                      |
| Reflections collected                       | 71901                                                                                                                         |
| Independent reflections                     | 6999 [R <sub>int</sub> = 0.0548, R <sub>sigma</sub> = 0.0348]                                                                 |
| Data/restraints/parameters                  | 6999/0/357                                                                                                                    |
| Goodness-of-fit on F <sup>2</sup>           | 1.041                                                                                                                         |
| Final R indexes [I ≥ 2σ (I)]                | R <sub>1</sub> = 0.0284, wR <sub>2</sub> = 0.0472                                                                             |
| Final R indexes [all data]                  | R <sub>1</sub> = 0.0414, wR <sub>2</sub> = 0.0501                                                                             |
| Largest diff. peak/hole / e Å <sup>-3</sup> | 0.47/-0.44                                                                                                                    |

## X-Ray Structure Determination, [(POBBOP)(Ru)(CO)<sub>2</sub>(Au)(Cl)]<sub>2</sub> (2-Au)

X-ray intensity data from a colorless plate were collected at 100(2) K using a Bruker D8 QUEST diffractometer equipped with a PHOTON 100 CMOS area detector and an Incoatec microfocus source (Mo K $\alpha$  radiation,  $\lambda = 0.71073$  Å).<sup>1</sup> The raw area detector data frames were reduced and corrected for absorption effects using the SAINT+ and SADABS programs.<sup>1</sup> Final unit cell parameters were determined by least-squares refinement of 9793 reflections taken from the data set. The structure was solved by direct methods with SHELXT.<sup>2</sup> Subsequent difference Fourier calculations and full-matrix least-squares refinement against  $F^2$  were performed with SHELXL-2014<sup>2</sup> using OLEX2.<sup>3</sup>

The compound crystallizes in the monoclinic system. The pattern of systematic absences in the intensity data was consistent with the space group  $P2_1/c$ , which was confirmed by structure solution. The asymmetric unit consists of half of one {Ru(CO)<sub>2</sub>(C<sub>14</sub>H<sub>36</sub>B<sub>10</sub>O<sub>2</sub>P<sub>2</sub>)}<sub>2</sub>(AuCl)<sub>2</sub> complex, which is located on a crystallographic inversion center. All non-hydrogen atoms were refined with anisotropic displacement parameters. Hydrogen atoms bonded to carbon were located in Fourier difference maps before being placed in geometrically idealized positions and included as riding atoms with  $d(\text{C-H}) = 1.00$  Å and  $U_{\text{iso}}(\text{H}) = 1.2U_{\text{eq}}(\text{C})$  for methine hydrogen atoms and  $d(\text{C-H}) = 0.98$  Å and  $U_{\text{iso}}(\text{H}) = 1.5U_{\text{eq}}(\text{C})$  for methyl hydrogens. The methyl hydrogens were allowed to rotate as a rigid group to the orientation of maximum observed electron density. Hydrogen atoms bonded to boron were located in difference maps and refined freely. The largest residual electron density peak in the final difference map is  $0.66 \text{ e}^-/\text{Å}^3$ , located  $0.07$  Å from Au1.

(1) APEX2 Version 2014.9-0, SAINT+ Version 8.34A and SADABS Version 2014/4. Bruker Analytical X-ray Systems, Inc., Madison, Wisconsin, USA, 2014.

(2) (a) SHELXT: Sheldrick, G.M. *Acta Cryst.* **2015**, *A71*, 3-8. (b) SHELXL: Sheldrick, G.M. *Acta Cryst.* **2008**, *A64*, 112-122.

(3) Dolomanov, O. V., Bourhis, L. J., Gildea, R. J., Howard J. A. K. and Puschmann, H. OLEX2: a complete structure solution, refinement and analysis program. *J. Appl. Cryst.* **2009**, *42*, 339-341.

Table S-3. Crystal data and structure refinement for [(POBBOP)(Ru)(CO)<sub>2</sub>(Au)(Cl)]<sub>2</sub> (**2-Au**)

|                                             |                                                                                                                               |
|---------------------------------------------|-------------------------------------------------------------------------------------------------------------------------------|
| Identification code                         | BE395                                                                                                                         |
| Empirical formula                           | C <sub>32</sub> H <sub>72</sub> Au <sub>2</sub> B <sub>20</sub> Cl <sub>2</sub> O <sub>8</sub> P <sub>4</sub> Ru <sub>2</sub> |
| Formula weight                              | 1591.94                                                                                                                       |
| Temperature/K                               | 100(2)                                                                                                                        |
| Crystal system                              | monoclinic                                                                                                                    |
| Space group                                 | P2 <sub>1</sub> /c                                                                                                            |
| a/Å                                         | 12.4210(5)                                                                                                                    |
| b/Å                                         | 12.5960(6)                                                                                                                    |
| c/Å                                         | 19.0782(8)                                                                                                                    |
| α/°                                         | 90                                                                                                                            |
| β/°                                         | 101.457(2)                                                                                                                    |
| γ/°                                         | 90                                                                                                                            |
| Volume/Å <sup>3</sup>                       | 2925.4(2)                                                                                                                     |
| Z                                           | 2                                                                                                                             |
| ρ <sub>calc</sub> /g/cm <sup>3</sup>        | 1.807                                                                                                                         |
| μ/mm <sup>-1</sup>                          | 5.748                                                                                                                         |
| F(000)                                      | 1536.0                                                                                                                        |
| Crystal size/mm <sup>3</sup>                | 0.18 × 0.16 × 0.04                                                                                                            |
| Radiation                                   | MoKα (λ = 0.71073)                                                                                                            |
| 2θ range for data collection/°              | 4.356 to 60.268                                                                                                               |
| Index ranges                                | -17 ≤ h ≤ 17, -17 ≤ k ≤ 17, -26 ≤ l ≤ 26                                                                                      |
| Reflections collected                       | 155104                                                                                                                        |
| Independent reflections                     | 8607 [R <sub>int</sub> = 0.0558, R <sub>sigma</sub> = 0.0234]                                                                 |
| Data/restraints/parameters                  | 8607/0/357                                                                                                                    |
| Goodness-of-fit on F <sup>2</sup>           | 1.079                                                                                                                         |
| Final R indexes [I ≥ 2σ (I)]                | R <sub>1</sub> = 0.0225, wR <sub>2</sub> = 0.0340                                                                             |
| Final R indexes [all data]                  | R <sub>1</sub> = 0.0301, wR <sub>2</sub> = 0.0352                                                                             |
| Largest diff. peak/hole / e Å <sup>-3</sup> | 0.67/-0.74                                                                                                                    |



## X-Ray Structure Determination, (POBBOP)(Ru)(Ag)(CH<sub>3</sub>CN)(NO<sub>3</sub>) (2-Ag)

X-ray intensity data from a colorless prism were collected at 100(2) K using a Bruker D8 QUEST diffractometer equipped with a PHOTON-100 CMOS area detector and an Incoatec microfocus source (Mo K $\alpha$  radiation,  $\lambda = 0.71073$  Å). The raw area detector data frames were reduced and corrected for absorption effects using the Bruker APEX3, SAINT+ and SADABS programs.<sup>1,2</sup> Final unit cell parameters were determined by least-squares refinement of 9913 reflections taken from the data set. The structure was solved by direct methods with SHELXT.<sup>3</sup> Subsequent difference Fourier calculations and full-matrix least-squares refinement against  $F^2$  were performed with SHELXL-2014<sup>3</sup> using OLEX2.<sup>4</sup>

The compound crystallizes in the monoclinic system. The pattern of systematic absences in the intensity data was consistent with the space groups  $P2/n$  and  $Pn$ . The acentric group  $Pn$  was confirmed by structure solution and by analysis with ADDSYM,<sup>5</sup> which found no missed symmetry. The asymmetric unit consists of one molecule. All non-hydrogen atoms were refined with anisotropic displacement parameters. Hydrogen atoms bonded to carbon were located in Fourier difference maps before being placed in geometrically idealized positions and included as riding atoms with  $d(\text{C-H}) = 1.00$  Å and  $U_{\text{iso}}(\text{H}) = 1.2U_{\text{eq}}(\text{C})$  for methine hydrogen atoms and  $d(\text{C-H}) = 0.98$  Å and  $U_{\text{iso}}(\text{H}) = 1.5U_{\text{eq}}(\text{C})$  for methyl hydrogens. The methyl hydrogens were allowed to rotate as a rigid group to the orientation of maximum observed electron density. Hydrogen atoms bonded to boron were located in difference maps and refined freely. The largest residual electron density peak in the final difference map is  $0.33 \text{ e}^-/\text{Å}^3$ , located  $0.69$  Å from C2. The absolute structure (Flack) parameter after the final refinement cycle was  $0.003(7)$ .

(1) APEX3 Version 2016.5-0 and SAINT+ Version 8.37A. Bruker AXS, Inc., Madison, Wisconsin, USA, 2016.

(2) SADABS-2016/2: Krause, L., Herbst-Irmer, R., Sheldrick G.M. and Stalke D. *J. Appl. Cryst.* **2015**, *48*, 3-10.

(3) (a) SHELXT: Sheldrick, G.M. *Acta Cryst.* **2015**, *A71*, 3-8. (b) SHELXL: Sheldrick, G.M. *Acta Cryst.* **2008**, *A64*, 112-122.

(4) OLEX2: a complete structure solution, refinement and analysis program. Dolomanov, O. V., Bourhis, L. J., Gildea, R. J., Howard J. A. K. and Puschmann, H. *J. Appl. Cryst.* **2009**, *42*, 339-341.

(5) (a) LePage, Y. *J. Appl. Crystallogr.* **1987**, *20*, 264-269. (b) Spek, A. L. *J. Appl. Crystallogr.*, **1988**, *21*, 578-579. (c) Spek, A. L. *Acta Crystallogr., Sect A* **1990**, *46*, C34. (d) PLATON: Spek, A.L. *Acta Cryst.*, **2009**, *D65*, 148-155.

Table S-4. Crystal data and structure refinement for  
**(POBBOP)(Ru)(Ag)(CH<sub>3</sub>CN)(NO<sub>3</sub>) (2-Ag)**

|                                             |                                                                                                   |
|---------------------------------------------|---------------------------------------------------------------------------------------------------|
| Identification code                         | BE3166                                                                                            |
| Empirical formula                           | C <sub>18</sub> H <sub>39</sub> AgB <sub>10</sub> N <sub>2</sub> O <sub>7</sub> P <sub>2</sub> Ru |
| Formula weight                              | 774.49                                                                                            |
| Temperature/K                               | 100(2)                                                                                            |
| Crystal system                              | monoclinic                                                                                        |
| Space group                                 | Pn                                                                                                |
| a/Å                                         | 10.6009(5)                                                                                        |
| b/Å                                         | 13.8331(7)                                                                                        |
| c/Å                                         | 11.0738(5)                                                                                        |
| α/°                                         | 90                                                                                                |
| β/°                                         | 103.867(2)                                                                                        |
| γ/°                                         | 90                                                                                                |
| Volume/Å <sup>3</sup>                       | 1576.57(13)                                                                                       |
| Z                                           | 2                                                                                                 |
| ρ <sub>calc</sub> /g/cm <sup>3</sup>        | 1.631                                                                                             |
| μ/mm <sup>-1</sup>                          | 1.241                                                                                             |
| F(000)                                      | 776.0                                                                                             |
| Crystal size/mm <sup>3</sup>                | 0.44 × 0.38 × 0.22                                                                                |
| Radiation                                   | MoKα (λ = 0.71073)                                                                                |
| 2θ range for data collection/°              | 5.614 to 65.344                                                                                   |
| Index ranges                                | -16 ≤ h ≤ 15, -21 ≤ k ≤ 20, -16 ≤ l ≤ 16                                                          |
| Reflections collected                       | 50528                                                                                             |
| Independent reflections                     | 11466 [R <sub>int</sub> = 0.0384, R <sub>sigma</sub> = 0.0373]                                    |
| Data/restraints/parameters                  | 11466/2/412                                                                                       |
| Goodness-of-fit on F <sup>2</sup>           | 1.031                                                                                             |
| Final R indexes [I ≥ 2σ (I)]                | R <sub>1</sub> = 0.0215, wR <sub>2</sub> = 0.0379                                                 |
| Final R indexes [all data]                  | R <sub>1</sub> = 0.0250, wR <sub>2</sub> = 0.0387                                                 |
| Largest diff. peak/hole / e Å <sup>-3</sup> | 0.33/-0.34                                                                                        |
| Flack parameter                             | 0.003(7)                                                                                          |

(a)

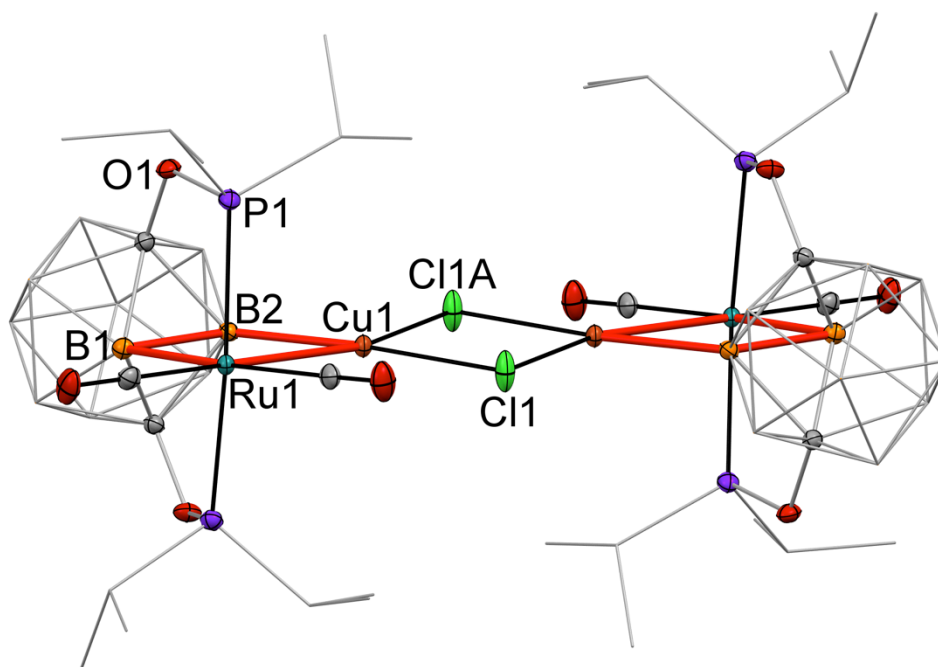

(b)

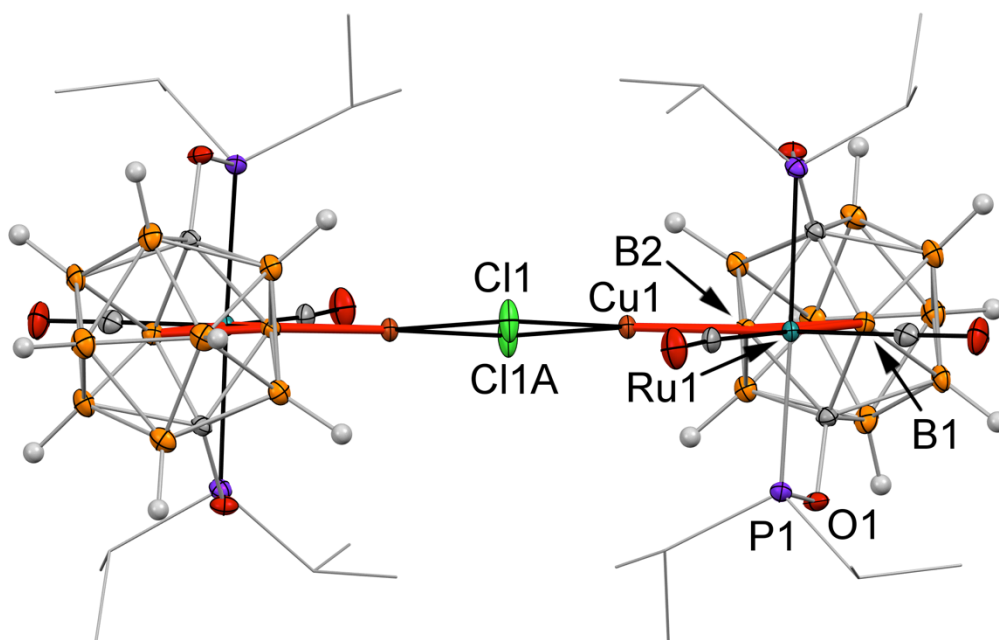

**Figure S-21.** Displacement ellipsoid plot (50% probability) of the  $[(\text{POBBOP})\text{Ru}(\text{CO})_2(\text{Cu})(\text{Cl})]_2$  complex (**2-Cu**). (a): a general view (b): a view parallel to the B2–Cu1–Ru1–B1 plane demonstrating planarity of the environment of the copper center. Hydrogen atoms, and the majority of boron and carbon atoms are omitted for clarity.

(a)

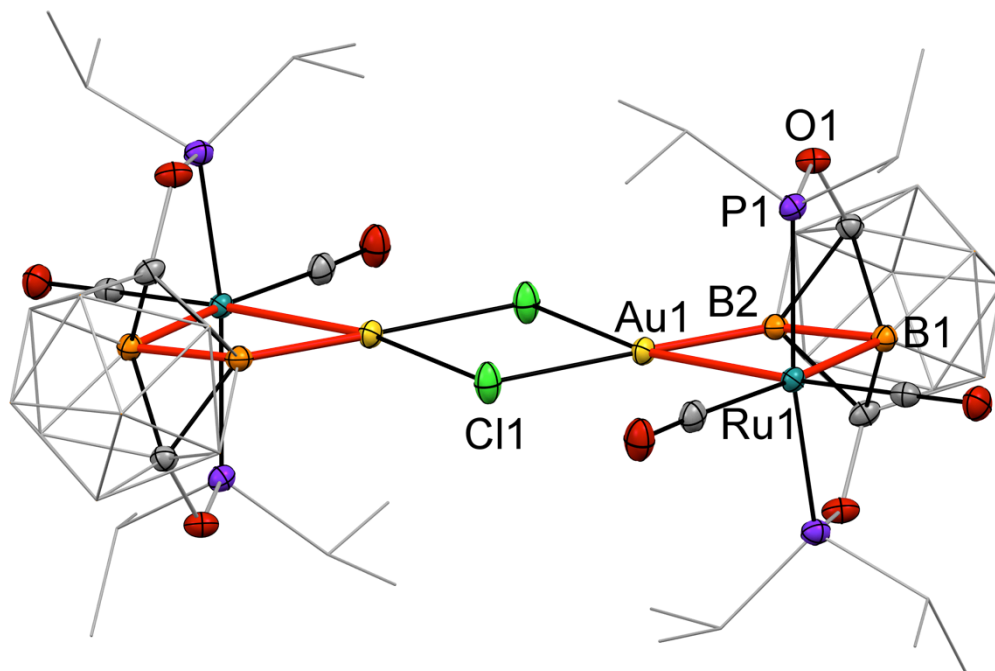

(b)

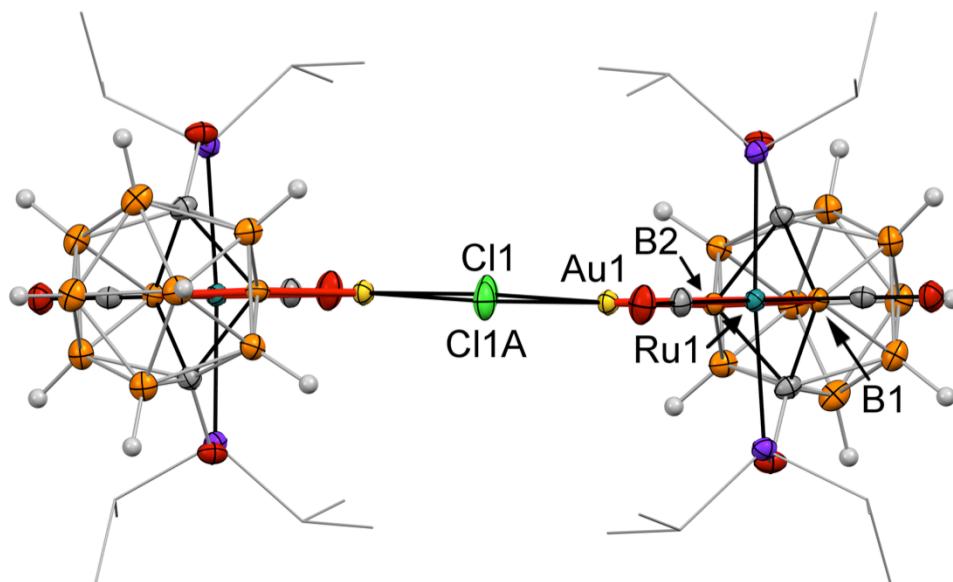

**Figure S-22.** Displacement ellipsoid plot (50% probability) of the  $[(\text{POBBOP})\text{Ru}(\text{CO})_2(\text{Au})(\text{Cl})]_2$  complex (**2-Au**). (a): a general view (b): a view parallel to the B2–Au1–Ru1–B1 plane demonstrating planarity of the environment of the copper center. Hydrogen atoms, and the majority of boron and carbon atoms are omitted for clarity.

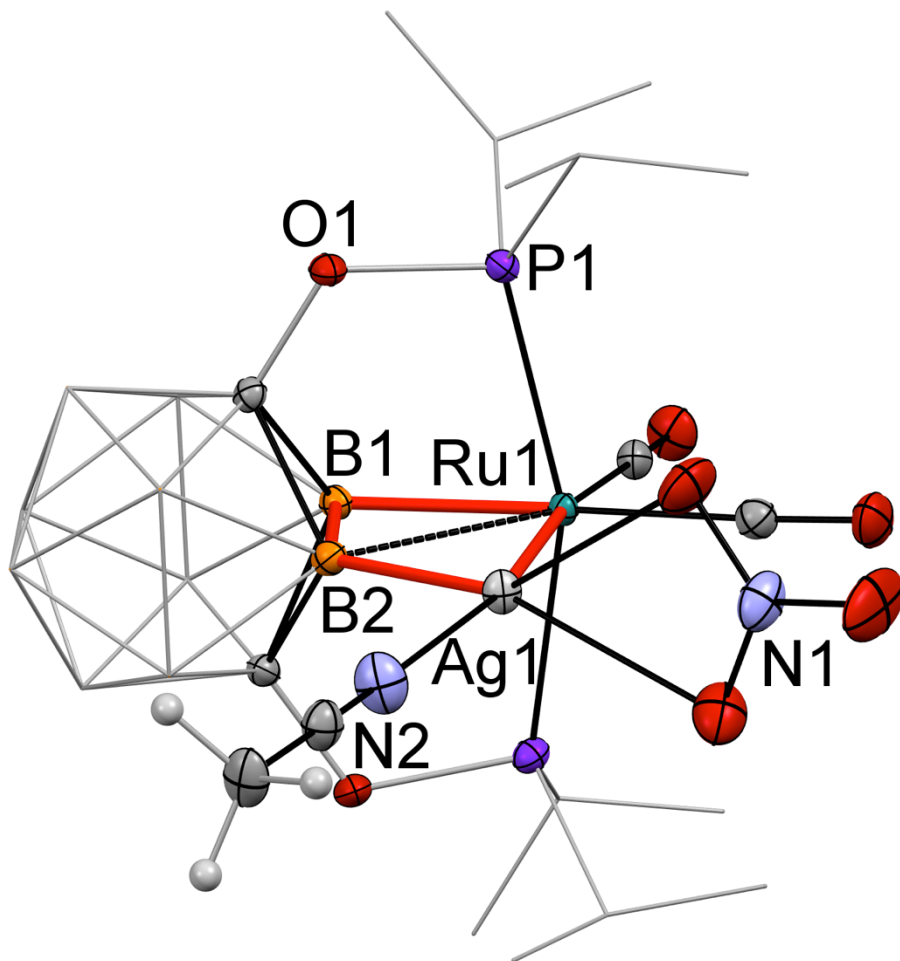

**Figure S-23.** Displacement ellipsoid plot (50% probability) of the  $[(\text{POBBOP})\text{Ru}(\text{CO})_2(\text{Ag})(\text{CH}_3\text{CN})(\text{NO}_3)]$  complex (**2-Ag**). A general view. Hydrogen atoms, and the majority of boron and carbon atoms are omitted for clarity.
